# Supplementary material for: Male group size, female distribution and changes in sexual segregation by Roosevelt elk
Source: PLoS One. 2017 Nov 9;12(11):e0187829. doi: 10.1371/journal.pone.0187829 (PMC5679572; doi:10.1371/journal.pone.0187829)
Supplement: S1 Data — (XLSX) [file pone.0187829.s001.xlsx]

## Sheet: Segregation data Meadow
	2017					2016					2015					2014					2013					2012					2011					2010					2009					2008
	Male	Female	Survey			Male	Female	Survey			Male	Female	Survey			Male	Female	Survey			Male	Female	Survey			Male	Female	Survey			Male	Female	Survey			Male	Female	Survey			Male	Female	Survey			Male	Female	Survey
	3	52	1	Davison		1	50	1	Davison		2	46	1	Davison		1	32	1	Davison		7	33	1	Davison		3	32	1	Davison		8	55	1	Davison		8	30	1	Davison		6	32	1	Davison		5	27	1	Davison
	4	0	1	Boyes		5	0	1	Boyes		2	47	2	Davison		5	0	1	Boyes		0	0	1	Boyes		10	0	1	Boyes		4	0	1	Boyes		3	0	1	Boyes		1	5	1	Boyes		4	5	1	Boyes
	4	52	2	Davison		0	50	2	Davison		4	0	2	Boyes		2	37	2	Davison		6	33	2	Davison		2	32	2	Davison		9	54	2	Davison		6	30	2	Davison		10	32	2	Davison		6	27	2	Davison
	4	0	2	Boyes		5	0	2	Boyes		2	47	3	Davison		5	0	2	Boyes		2	0	2	Boyes		10	0	2	Boyes		2	0	2	Boyes		1	4	2	Boyes		0	5	2	Boyes		0	5	2	Boyes
	4	52	3	Davison		1	50	3	Davison		4	0	3	Boyes		2	37	3	Davison		5	33	3	Davison		4	32	3	Davison		8	54	3	Davison		5	30	3	Davison		8	32	3	Davison		9	27	3	Davison
	4	0	3	Boyes		5	0	3	Boyes		2	47	4	Davison		5	0	3	Boyes		5	0	3	Boyes		10	0	3	Boyes		2	0	3	Boyes		4	4	3	Boyes		0	5	3	Boyes				3	Boyes
	0	52	4	Davison		1	50	4	Davison		0	47	5	Davison		1	37	4	Davison		4	33	4	Davison		4	32	4	Davison		8	55	4	Davison		6	30	4	Davison		3	32	4	Davison		12	27	4	Davison
	4	0	4	Boyes		5	0	4	Boyes		3	0	5	Boyes		5	0	4	Boyes		5	0	4	Boyes		10	0	4	Boyes				4	Boyes		3	0	4	Boyes		0	5	4	Boyes		0	5	4	Boyes
	4	52	5	Davison		0	50	5	Davison		3	47	6	Davison		1	37	5	Davison		5	33	5	Davison		3	32	5	Davison		8	55	5	Davison		5	30	5	Davison		3	32	5	Davison		12	27	5	Davison
	4	0	5	Boyes		5	0	5	Boyes		4	0	6	Boyes		5	0	5	Boyes		5	0	5	Boyes		10	0	5	Boyes				5	Boyes		4	4	5	Boyes		0	5	5	Boyes		0	5	5	Boyes
	0	52	6	Davison		0	50	6	Davison		3	47	7	Davison		1	37	6	Davison		5	33	6	Davison		3	32	6	Davison		8	54	6	Davison		6	30	6	Davison		4	32	6	Davison		7	27	6	Davison
	4	0	6	Boyes		5	0	6	Boyes		4	0	7	Boyes		5	0	6	Boyes		5	0	6	Boyes		9	0	6	Boyes				6	Boyes		4	4	6	Boyes		4	5	6	Boyes		0	4	6	Boyes
	8	52	7	Davison		1	50	7	Davison		2	47	8	Davison		1	37	7	Davison		6	33	7	Davison		3	32	7	Davison		7	55	7	Davison		4	30	7	Davison		7	32	7	Davison		10	27	7	Davison
	8	52	8	Davison		5	0	7	Boyes		1	0	8	Boyes		5	0	7	Boyes		5	0	7	Boyes		8	0	7	Boyes		3	0	7	Boyes				7	Boyes		4	5	7	Boyes				7	Boyes
	8	52	9	Davison		1	50	8	Davison		2	47	9	Davison		2	37	8	Davison		6	33	8	Davison		3	32	8	Davison		7	54	8	Davison		5	30	8	Davison		6	16	8	Davison		9	27	8	Davison
	4	52	10	Davison		5	0	8	Boyes		4	0	9	Boyes		5	0	8	Boyes		5	0	8	Boyes				8	Boyes		3	0	8	Boyes		4	4	8	Boyes		0	5	8	Boyes				8	Boyes
	4	0	10	Boyes		1	50	9	Davison		2	47	10	Davison		4	37	9	Davison		4	33	9	Davison		3	32	9	Davison		5	54	9	Davison		5	30	9	Davison		4	32	9	Davison		11	27	9	Davison
						3	0	9	Boyes		4	0	10	Boyes		5	0	9	Boyes		5	0	9	Boyes		9	0	9	Boyes		3	0	9	Boyes		3	0	9	Boyes		4	5	9	Boyes				9	Boyes
						2	0	10	Davison							4	37	10	Davison		6	33	10	Davison		3	32	10	Davison		1	54	10	Davison		5	30	10	Davison		5	32	10	Davison		12	32	10	Davison
						3	0	10	Boyes							5	0	10	Boyes		5	0	10	Boyes		9	0	10	Boyes		3	0	10	Boyes		3	4	10	Boyes		3	5	10	Boyes				10	Boyes

## Sheet: Segregation data Group
2017					2016					2015					2014					2013				2012				2011				2010				2009				2008				2007				2006
Males	Females	total	Survey		Males	Females	total	Survey		Males	Females	total	Survey		Males	Females	total	Survey		Males	Females	Survey		Males	Females	Survey		Males	Females	Survey		Males	Females	Survey		Males	Females	Survey		Males	Females	Survey		Males	Females	Survey		Males	Females
3	52	55	1		0	50	50	1		2	46	48	1		1	32	33	1		0	33	1		10	0	1		3	0	1		5	30	1		4	32	1		2	0	1		9	20	1		2	17
4	0	4	1		5	0	5	1		4	0	4	2		2	0	2	1		5	0	1		3	35	1		4	30	1		1	0	1		1	0	1		3	0	1		0	5	1		2	0
3	52	55	2		1	0	1	1		0	47	47	2		1	0	1	1		2	0	1		10	0	2		4	0	1		2	0	1		1	0	1		4	0	1		1	0	1		0	5
1	0	1	2		3	0	3	2		2	0	2	2		1	0	1	1		1	0	2		1	0	2		0	24	1		3	0	1		1	0	1		0	5	1		0	5	2		1	0
4	0	4	2		2	0	2	2		4	0	4	3		1	0	1	1		1	0	2		1	32	2		1	0	1		1	4	2		0	5	1		0	27	1		7	0	2		10	0
4	0	4	3		0	50	50	2		0	47	47	3		5	0	5	2		1	0	2		1	0	3		2	0	2		3	0	2		0	5	2		0	5	2		2	20	2		0	5
3	52	55	3		5	0	5	3		2	0	2	3		1	37	38	2		2	0	2		3	32	3		2	0	2		2	0	2		2	0	2		4	0	2		0	34	2		2	17
1	0	1	3		1	0	1	3		2	0	2	4		1	0	1	2		3	33	2		10	0	3		4	0	2		4	30	2		0	32	2		1	0	2		1	0	2		10	0
0	52	52	4		0	50	50	3		0	47	47	4		1	0	1	2		5	0	3		10	0	4		30	0	2		3	0	3		5	0	2		0	27	2		0	5	3		0	5
4	0	4	4		5	0	5	4		3	0	3	5		5	0	5	3		5	33	3		3	32	4		0	24	2		1	4	3		1	0	2		3	0	2		7	0	3		2	0
0	52	52	5		0	50	50	4		0	47	47	5		1	0	1	3		3	0	4		1	0	4		3	0	2		2	0	3		0	5	3		2	0	2		2	0	3		2	17
4	0	4	5		1	0	1	4		4	0	4	6		1	37	38	3		1	33	4		7	0	5		2	0	3		5	30	3		5	0	3		2	27	3		0	10	3		10	0
3	0	3	5		0	50	50	5		2	47	49	6		1	0	1	3		5	0	4		3	0	5		2	0	3		1	0	4		1	32	3		3	0	3		1	0	3		10	0
1	1	2	5		5	0	5	5		1	0	1	6		1	37	38	4		2	0	5		3	32	5		4	31	3		5	30	4		2	0	3		3	0	3		2	20	3		2	17
4	0	4	6		5	0	5	6		1	0	1	7		5	0	5	4		3	0	5		3	32	6		4	0	3		2	0	4		1	0	4		1	0	3		0	37	4		0	5
0	52	52	6		0	50	50	6		1	47	48	7		1	0	1	4		5	33	5		6	0	6		0	24	3		3	0	4		1	0	4		6	0	4		5	0	4		2	0
7	52	59	7		0	50	50	7		4	0	4	7		1	37	38	5		5	0	6		3	0	6		0	25	4		2	0	5		1	32	4		1	27	4		1	20	4		0	5
1	0	1	7		5	0	5	7		1	0	1	7		5	0	5	5		2	33	6		3	32	7		3	30	4		5	30	5		0	5	4		0	5	4		1	0	4		2	17
8	60	68	8		1	0	1	7		1	47	48	8		5	0	5	6		3	0	6		1	0	7		2	0	4		1	4	5		1	32	5		2	0	4		1	0	4		10	0
7	52	59	9		5	0	5	8		1	0	1	8		1	37	38	6		4	0	7		8	0	7		1	0	4		3	0	5		1	0	5		3	0	4		1	0	5		1	0
4	52	56	10		0	50	50	8		1	0	1	8		1	0	1	6		2	33	7		3	32	8		1	0	4		3	0	6		1	0	5		0	5	5		1	20	5		1	5
4	0	4	10		1	0	1	8		4	0	4	9		2	0	2	7		5	0	7		3	32	9		2	0	4		1	4	6		5	0	5		1	0	5		2	0	5		2	0
					0	50	50	9		1	47	48	9		3	0	3	7		2	0	8		1	0	9		1	0	5		2	0	6		0	5	5		0	27	5		2	0	5		2	17
					3	0	3	9		1	0	1	9		1	37	38	7		3	0	8		2	0	9		8	30	5		0	30	6		0	5	6		2	0	5		0	37	5		10	0
					1	0	1	9		2	47	49	10		5	0	5	8		2	32	8		6	0	9		2	0	5		5	0	6		1	32	6		3	0	5		5	0	5		5	0
					2	0	2	10		4	0	4	10		1	0	1	8		4	0	8		9	0	10		0	24	5		1	0	6		4	0	6		6	0	5		0	5	6		5	0
					3	0	3	10							3	37	40	8		0	1	8		3	32	10		1	0	5		4	30	7		3	0	6		1	0	6		5	0	6		2	17
															1	0	1	8		5	0	9						0	30	6		2	0	7		1	0	7		1	27	6		5	20	6		1	5
															5	0	5	9		1	0	9						3	0	6		2	0	8		2	0	7		1	0	6		0	37	6		4	0
															4	37	41	9		4	32	9						0	24	6		0	4	8		1	32	7		4	0	6		1	0	6		0	5
															4	37	41	10		0	1	9						2	0	6		2	0	8		1	0	7		0	4	6		0	37	7		2	17
															4	0	4	10		3	32	10						3	0	6		2	0	8		4	0	7		5	0	7		1	20	7		10	0
															1	0	1	10		3	0	10						5	30	7		1	30	8		0	5	7		0	27	7		4	0	7		2	0
																				1	0	10						3	0	7		4	0	8		1	0	7		4	0	7		6	0	7		1	0
																				0	1	10						3	0	7		3	0	9		1	0	7		1	0	7		1	0	8		0	5
																												3	0	7		2	0	9		0	5	8		0	27	8		10	0	8		1	0
																												0	24	7		5	30	9		1	16	8		1	0	8		2	20	8		2	17
																												3	0	8		1	0	9		3	0	8		3	0	8		0	37	8		10	0
																												6	54	8						2	0	8		1	0	8		0	5	9		10	17
																												1	0	8						4	0	9		4	0	8		1	0	9		1	0
																												3	0	9						1	32	9		0	5	9		11	0	9		1	0
																												5	54	9						2	0	9		4	0	9		0	20	9		3	0
																												0	54	10						0	5	9		0	27	9		0	37	9
																												3	0	10						1	0	9		2	0	9		1	0	10
																												3	0	10						2	0	10		5	0	9		6	0	10
																												1	0	10						2	0	10		2	0	10		2	25	10
																																				3	32	10		0	27	10		2	0	10
																																				3	0	10		2	0	10		0	37	10
																																				0	5	10		0	5	10
																																				1	0	10		1	0	10
																																								2	0	10
																																								5	0	10
[truncated: 28 more columns]

## Sheet: Male group size data
Year	Survey	Group size
1997	1	13
1997	2	16
1997	2	5
1997	2	5
1997	2	1
1997	3	16
1997	3	4
1997	4	16
1997	4	1
1997	4	2
1997	5	14
1997	5	1
1997	5	4
1997	5	2
1997	5	1
1997	6	2
1997	6	4
1997	7	16
1997	7	1
1997	8	16
1997	8	5
1997	9	17
1997	10	12
1997	10	1
1998	1	11
1998	1	8
1998	2	18
1998	2	2
1998	3	20
1998	3	2
1998	3	2
1998	4	10
1998	4	10
1998	5	10
1998	5	1
1998	5	10
1999	1	12
1999	1	5
1999	2	18
1999	3	14
1999	3	2
1999	4	18
1999	4	2
1999	4	3
1999	5	1
1999	5	1
1999	5	5
2000	1	13
2000	1	3
2000	1	2
2000	2	13
2000	2	2
2000	2	1
2000	3	13
2000	3	4
2000	3	1
2000	4	10
2000	4	5
2000	4	3
2000	4	1
2000	5	13
2000	5	5
2000	6	9
2000	6	6
2000	7	9
2000	7	2
2000	7	2
2000	7	3
2000	8	11
2000	8	3
2000	9	13
2000	9	2
2000	9	1
2000	10	12
2001	1	5
2001	1	6
2001	1	2
2001	2	14
2001	2	1
2001	3	11
2001	3	3
2001	3	2
2001	4	13
2001	4	2
2001	5	12
2001	5	1
2001	6	6
2001	6	2
2001	6	6
2001	6	2
2001	7	2
2001	7	9
2001	7	2
2001	8	10
2001	8	3
2001	8	3
2001	9	9
2001	10	6
2001	10	8
2001	10	2
2001	10	2
2002	1	1
2002	1	11
2002	1	3
2002	1	1
2002	1	3
2002	2	4
2002	2	6
2002	2	5
2002	3	9
2002	3	3
2002	3	3
2002	3	3
2002	4	9
2002	4	4
2002	4	1
2002	5	6
2002	5	8
2002	5	5
2002	6	10
2002	6	2
2002	6	2
2002	6	1
2002	7	16
2002	7	3
2002	8	11
2002	8	2
2002	8	4
2002	9	1
2002	9	7
2002	9	1
2002	9	6
2002	10	14
2002	10	2
2003	1	2
2003	1	10
2003	2	3
2003	2	2
2003	2	1
2003	2	1
2003	3	5
2003	3	3
2003	4	1
2003	4	1
2003	4	3
2003	4	3
2003	4	1
2003	4	1
2003	5	2
2003	5	1
2003	5	1
2003	5	2
2003	5	1
2003	5	1
2003	5	2
2003	6	1
2003	6	5
2003	6	1
2003	6	1
2003	7	6
2003	7	3
2003	7	2
2003	7	1
2003	7	1
2003	8	6
2003	8	5
2003	8	1
2003	9	11
2003	9	1
2003	10	7
2003	10	4
2003	10	4
2003	10	1
2004	1	11
2004	1	3
2004	1	1
2004	1	2
2004	2	13
2004	2	4
2004	2	1
2004	3	13
2004	3	2
2004	3	2
2004	3	1
2004	4	16
2004	4	7
2004	5	2
2004	5	16
2004	6	5
2004	6	3
2004	6	10
2004	6	2
2004	7	14
2004	7	2
2004	7	2
2004	8	5
2004	8	3
2004	9	12
2004	9	3
2004	10	1
2004	10	2
2004	10	11
2004	10	2
2004	10	2
2005	1	9
2005	1	1
2005	1	8
2005	2	17
2005	3	4
2005	3	8
2005	3	6
2005	4	5
2005	4	3
2005	4	10
2005	5	6
2005	5	2
2005	5	8
2005	5	2
2005	6	8
2005	6	2
2005	6	8
2005	7	8
2005	7	2
2005	8	14
2005	8	2
2005	9	15
2005	9	2
2005	10	15
2005	10	2
2006	1	10
2006	1	1
2006	1	2
2006	2	10
2006	3	2
2006	3	10
2006	4	2
2006	4	10
2006	5	10
2006	5	1
2006	6	2
2006	6	10
2006	7	5
2006	7	5
2006	7	2
2006	8	2
2006	8	10
2006	8	1
2006	9	10
2006	9	1
2006	10	1
2006	10	1
2006	10	3
2007	1	1
2007	2	7
2007	2	1
2007	3	2
2007	3	1
2007	3	7
2007	4	5
2007	4	1
2007	4	1
2007	5	2
2007	5	2
2007	5	1
2007	5	5
2007	6	5
2007	6	1
2007	7	4
2007	7	6
2007	8	10
2007	8	1
2007	9	1
2007	9	5
2007	9	11
2007	10	2
2007	10	1
2007	10	6
2008	1	2
2008	1	3
2008	2	4
2008	2	1
2008	2	3
2008	2	2
2008	3	3
2008	3	3
2008	3	1
2008	4	6
2008	4	2
2008	4	3
2008	5	1
2008	5	2
2008	5	3
2008	5	6
2008	6	1
2008	6	1
2008	6	4
2008	7	5
2008	7	4
2008	7	1
2008	7	4
2008	8	1
2008	8	3
2008	8	1
2008	8	4
2008	9	4
2008	9	2
2008	9	5
2008	10	2
2008	10	2
2008	10	1
2008	10	2
2008	10	5
2009	1	1
2009	1	1
2009	1	1
2009	2	2
2009	2	5
2009	2	1
2009	3	5
2009	3	2
2009	4	1
2009	4	1
2009	5	1
2009	5	1
2009	5	5
2009	6	4
2009	6	3
2009	7	1
2009	7	2
2009	7	1
2009	7	4
2009	7	1
2009	7	1
2009	8	3
2009	8	2
2009	9	4
2009	9	2
2009	9	1
2009	10	2
2009	10	2
2009	10	3
2009	10	1
2010	1	1
2010	1	2
2010	1	3
2010	2	3
2010	2	2
2010	3	3
2010	3	2
2010	4	1
2010	4	2
2010	4	3
2010	5	2
2010	5	3
2010	6	3
2010	6	2
2010	6	5
2010	6	1
2010	7	2
2010	8	2
2010	8	2
2010	8	2
2010	8	4
2010	9	3
2010	9	2
2010	9	1
2010	10	2
2010	10	1
2010	10	3
2011	1	3
2011	1	4
2011	2	2
2011	2	2
2011	2	3
2011	3	2
2011	3	2
2011	3	4
2011	4	2
2011	4	1
2011	4	1
2011	4	2
2011	5	1
2011	5	2
2011	5	1
2011	6	3
2011	6	2
2011	6	3
2011	7	3
2011	7	3
2011	7	3
2011	8	3
2011	8	1
2011	9	3
2011	10	3
2011	10	3
2011	10	1
2012	1	10
2012	2	10
2012	2	1
2012	3	1
2012	3	10
2012	4	10
2012	4	1
2012	5	7
2012	5	3
2012	6	6
2012	6	3
2012	7	1
2012	7	8
2012	9	1
2012	9	2
2012	9	6
2012	10	9
2013	1	5
2013	1	5
2013	2	1
2013	2	1
2013	2	1
2013	2	2
2013	3	5
2013	4	3
2013	4	5
2013	5	2
2013	5	3
2013	6	5
2013	6	3
2013	7	4
2013	7	5
2013	8	2
2013	8	3
2013	8	4
2013	10	5
2013	10	1
2014	1	2
2014	1	1
2014	1	1
2014	1	1
2014	2	5
2014	2	1
2014	2	1
2014	3	5
2014	3	1
2014	3	1
2014	4	5
2014	4	1
2014	5	5
2014	6	5
2014	6	1
2014	7	2
2014	7	3
2014	8	5
2014	8	1
2014	8	1
2014	9	5
2014	10	4
2014	10	1
2015	2	4
2015	2	2
2015	3	4
2015	3	2
2015	4	2
2015	5	3
2015	6	4
2015	6	1
2015	7	1
2015	7	4
2015	7	1
2015	8	1
2015	8	1
2015	9	4
2015	9	1
2015	10	4
2016	1	5
2016	1	1
2016	2	3
2016	2	2
2016	3	5
2016	3	1
2016	4	5
2016	4	1
2016	5	5
2016	6	5
2016	7	5
2016	7	1
2016	8	5
2016	8	1
2016	9	3
2016	9	1
2016	10	2
2016	10	3
2017	1	4
2017	2	1
2017	2	4
2017	3	4
2017	3	1
2017	4	4
2017	5	4
2017	5	3
2017	5	1
2017	6	4
2017	7	1
2017	9	1
2017	10	4

## Sheet: Forage biomass data
yr	plot	transect	sector	meadow	totbio
2005	1	a	sdav	dav	7.79023
2005	2	a	sdav	dav	4.03194
2005	3	a	sdav	dav	8.14074
2005	4	a	sdav	dav	8.8744
2005	5	a	sdav	dav	7.89079
2005	6	a	sdav	dav	8.8744
2005	7	a	sdav	dav	8.50213
2005	8	a	sdav	dav	9.95857
2005	9	a	sdav	dav	8.14074
2005	10	a	sdav	dav	8.31829
2005	11	a	sdav	dav	9.61436
2005	12	a	sdav	dav	10.6985
2005	13	a	sdav	dav	9.5863
2005	14	a	sdav	dav	8.1688
2005	15	a	sdav	dav	9.94769
2005	16	a	sdav	dav	10.32
2005	17	a	sdav	dav	10.32
2005	18	a	sdav	dav	9.40246
2005	19	a	sdav	dav	9.95857
2005	20	a	sdav	dav	11.0599
2005	21	a	sdav	dav	7.79023
2005	22	a	sdav	dav	8.89158
2005	23	a	sdav	dav	10.3371
2005	24	a	sdav	dav	9.76385
2005	25	a	sdav	dav	9.59718
2005	1	b	sdav	dav	9.25297
2005	2	b	sdav	dav	8.50213
2005	3	b	sdav	dav	10.6705
2005	4	b	sdav	dav	12.1269
2005	5	b	sdav	dav	7.87361
2005	6	b	sdav	dav	10.3371
2005	7	b	sdav	dav	8.86352
2005	8	b	sdav	dav	7.59551
2005	9	b	sdav	dav	11.0319
2005	10	b	sdav	dav	9.95857
2005	11	b	sdav	dav	11.4041
2005	12	b	sdav	dav	10.32
2005	13	b	sdav	dav	8.86352
2005	14	b	sdav	dav	11.5708
2005	15	b	sdav	dav	8.8744
2005	16	b	sdav	dav	10.4866
2005	17	b	sdav	dav	8.86352
2005	18	b	sdav	dav	9.94769
2005	19	b	sdav	dav	8.1688
2005	20	b	sdav	dav	8.51301
2005	21	b	sdav	dav	9.97575
2005	22	b	sdav	dav	13.3777
2005	23	b	sdav	dav	9.5863
2005	24	b	sdav	dav	10.0199
2005	25	b	sdav	dav	8.14074
2005	1	W	cdav	dav	8.57435
2005	2	W	cdav	dav	12.655
2005	3	W	cdav	dav	15.3794
2005	4	W	cdav	dav	10.848
2005	5	W	cdav	dav	12.5272
2005	6	W	cdav	dav	14.2953
2005	7	W	cdav	dav	16.2689
2005	8	W	cdav	dav	10.4866
2005	9	W	cdav	dav	12.655
2005	10	W	cdav	dav	19.7161
2005	11	W	cdav	dav	12.1883
2005	12	W	cdav	dav	15.1847
2005	13	W	cdav	dav	8.51301
2005	14	W	cdav	dav	11.9322
2005	15	W	cdav	dav	11.9322
2005	16	W	cdav	dav	13.7391
2005	17	W	cdav	dav	9.76385
2005	18	W	cdav	dav	21.9458
2005	19	W	cdav	dav	11.0427
2005	20	W	cdav	dav	9.76385
2005	1	c	cdav	dav	7.12879
2005	2	c	cdav	dav	20.0666
2005	3	c	cdav	dav	10.4866
2005	4	c	cdav	dav	13.951
2005	5	c	cdav	dav	12.2384
2005	6	c	cdav	dav	10.6705
2005	7	c	cdav	dav	13.5616
2005	8	c	cdav	dav	13.5896
2005	9	c	cdav	dav	9.70862
2005	10	c	cdav	dav	13.5616
2005	11	c	cdav	dav	10.6814
2005	12	c	cdav	dav	12.8388
2005	13	c	cdav	dav	14.718
2005	14	c	cdav	dav	9.65852
2005	15	c	cdav	dav	11.1041
2005	16	c	cdav	dav	10.0199
2005	17	c	cdav	dav	10.0199
2005	18	c	cdav	dav	10.3813
2005	19	c	cdav	dav	10.4866
2005	20	c	cdav	dav	10.1252
2005	1	d	dav pic	dav	3.54284
2005	2	d	dav pic	dav	5.34389
2005	3	d	dav pic	dav	3.97979
2005	4	d	dav pic	dav	5.29763
2005	5	d	dav pic	dav	8.53019
2005	6	d	dav pic	dav	3.54284
2005	7	d	dav pic	dav	3.97979
2005	8	d	dav pic	dav	3.54284
2005	9	d	dav pic	dav	3.54284
2005	10	d	dav pic	dav	8.59639
2005	1	e	dav pic	dav	4.34118
2005	2	e	dav pic	dav	3.90423
2005	3	e	dav pic	dav	9.21951
2005	4	e	dav pic	dav	12.4774
2005	5	e	dav pic	dav	4.15996
2005	6	e	dav pic	dav	3.11212
2005	7	e	dav pic	dav	4.75502
2005	8	e	dav pic	dav	0
2005	9	e	dav pic	dav	4.15996
2005	10	e	dav pic	dav	3.86528
2005	1	f	W, PC	dav	7.9569
2005	2	f	W, PC	dav	8.1688
2005	3	f	W, PC	dav	8.8744
2005	4	f	W, PC	dav	7.44602
2005	5	f	W, PC	dav	7.04029
2005	6	f	W, PC	dav	4.57485
2005	7	f	W, PC	dav	5.70527
2005	8	f	W, PC	dav	3.84068
2005	9	f	W, PC	dav	8.59639
2005	10	f	W, PC	dav	9.76385
2005	1	g	W, PC	dav	6.09472
2005	2	g	W, PC	dav	6.10561
2005	3	g	W, PC	dav	3.84068
2005	4	g	W, PC	dav	3.86528
2005	5	g	W, PC	dav	4.71346
2005	6	g	W, PC	dav	4.58806
2005	7	g	W, PC	dav	3.86528
2005	8	g	W, PC	dav	3.86528
2005	9	g	W, PC	dav	4.20207
2005	10	g	W, PC	dav	7.17889
2005	1	h	bdav	dav	13.0164
2005	2	h	bdav	dav	9.95857
2005	3	h	bdav	dav	12.2936
2005	4	h	bdav	dav	17.1864
2005	5	h	bdav	dav	9.5863
2005	6	h	bdav	dav	10.3091
2005	7	h	bdav	dav	9.95857
2005	8	h	bdav	dav	10.32
2005	9	h	bdav	dav	10.4866
2005	10	h	bdav	dav	11.3932
2005	11	h	bdav	dav	10.6814
2005	12	h	bdav	dav	10.1252
2005	13	h	bdav	dav	11.5156
2005	14	h	bdav	dav	11.1041
2005	15	h	bdav	dav	13.2724
2005	16	h	bdav	dav	8.15162
2005	17	h	bdav	dav	11.0427
2005	18	h	bdav	dav	12.5496
2005	19	h	bdav	dav	12.1659
2005	20	h	bdav	dav	11.2484
2005	1	i	bdav	dav	9.65852
2005	2	i	bdav	dav	9.95857
2005	3	i	bdav	dav	9.5863
2005	4	i	bdav	dav	10.6814
2005	5	i	bdav	dav	8.86352
2005	6	i	bdav	dav	11.0319
2005	7	i	bdav	dav	12.4883
2005	8	i	bdav	dav	9.04107
2005	9	i	bdav	dav	11.4041
2005	10	i	bdav	dav	6.7674
2005	11	i	bdav	dav	7.85157
2005	12	i	bdav	dav	6.74501
2005	13	i	bdav	dav	8.51301
2005	14	i	bdav	dav	9.40246
2005	15	i	bdav	dav	6.15902
2005	16	i	bdav	dav	9.5863
2005	17	i	bdav	dav	8.31829
2005	18	i	bdav	dav	8.51301
2005	19	i	bdav	dav	8.86352
2005	20	i	bdav	dav	7.06745
2005	1	j	adav	dav	10.4866
2005	2	j	adav	dav	13.5725
2005	3	j	adav	dav	11.4041
2005	4	j	adav	dav	14.2844
2005	5	j	adav	dav	8.96867
2005	6	j	adav	dav	9.76385
2005	7	j	adav	dav	11.8269
2005	8	j	adav	dav	10.1252
2005	9	j	adav	dav	12.5997
2005	10	j	adav	dav	10.0199
2005	11	j	adav	dav	11.1041
2005	12	j	adav	dav	12.8388
2005	13	j	adav	dav	11.0427
2005	14	j	adav	dav	16.8141
2005	15	j	adav	dav	11.7546
2005	16	j	adav	dav	9.65852
2005	17	j	adav	dav	10.6705
2005	18	j	adav	dav	8.8744
2005	19	j	adav	dav	14.2953
2005	20	j	adav	dav	11.9322
2005	1	k	adav	dav	9.23579
2005	2	k	adav	dav	9.23579
2005	3	k	adav	dav	8.93574
2005	4	k	adav	dav	8.31829
2005	5	k	adav	dav	10.4142
2005	6	k	adav	dav	11.7546
2005	7	k	adav	dav	9.04107
2005	8	k	adav	dav	11.0427
2005	9	k	adav	dav	7.20066
2005	10	k	adav	dav	11.0319
2005	11	k	adav	dav	10.848
2005	12	k	adav	dav	7.11547
2005	13	k	adav	dav	4.54679
2005	14	k	adav	dav	8.13534
2005	15	k	adav	dav	10.1922
2005	16	k	adav	dav	9.23579
2005	17	k	adav	dav	9.94769
2005	18	k	adav	dav	9.94769
2005	19	k	adav	dav	12.1269
2005	20	k	adav	dav	14.4067
2005	1	l	Horsebarn	dav	3.16773
2005	2	l	Horsebarn	dav	3.90423
2005	3	l	Horsebarn	dav	3.90423
2005	4	l	Horsebarn	dav	4.61612
2005	5	l	Horsebarn	dav	4.92536
2005	6	l	Horsebarn	dav	3.73756
2005	7	l	Horsebarn	dav	3.34811
2005	8	l	Horsebarn	dav	0
2005	9	l	Horsebarn	dav	6.14995
2005	10	l	Horsebarn	dav	4.44663
2005	11	l	Horsebarn	dav	3.82401
2005	12	l	Horsebarn	dav	5.13359
2005	13	l	Horsebarn	dav	0
2005	14	l	Horsebarn	dav	0
2005	15	l	Horsebarn	dav	0
2005	16	l	Horsebarn	dav	0
2005	17	l	Horsebarn	dav	0
2005	18	l	Horsebarn	dav	0
2005	19	l	Horsebarn	dav	0
2005	20	l	Horsebarn	dav	0
2005	1	m	Horsebarn	dav	5.15852
2005	2	m	Horsebarn	dav	3.54284
2005	3	m	Horsebarn	dav	0
2005	4	m	Horsebarn	dav	10.7427
2005	5	m	Horsebarn	dav	4.74414
2005	6	m	Horsebarn	dav	3.93229
2005	7	m	Horsebarn	dav	0
2005	8	m	Horsebarn	dav	4.28279
2005	9	m	Horsebarn	dav	0
2005	10	m	Horsebarn	dav	1.89972
2005	11	m	Horsebarn	dav	3.23984
2005	12	m	Horsebarn	dav	3.86528
2005	13	m	Horsebarn	dav	2.01656
2005	14	m	Horsebarn	dav	4.22435
2005	15	m	Horsebarn	dav	2.40601
2005	16	m	Horsebarn	dav	3.2679
2005	17	m	Horsebarn	dav	3.6184
2005	18	m	Horsebarn	dav	5.34389
2005	19	m	Horsebarn	dav	7.51222
2005	20	m	Horsebarn	dav	2.79546
2005	1	n	c	boy	3.85157
2005	2	n	c	boy	2.52794
2005	3	n	c	boy	2.87845
2005	4	n	c	boy	3.2679
2005	5	n	c	boy	3.23984
2005	6	n	c	boy	4.63199
2005	7	n	c	boy	5.35477
2005	8	n	c	boy	4.99338
2005	9	n	c	boy	4.43727
2005	10	n	c	boy	4.63199
2005	11	n	c	boy	5.19899
2005	12	n	c	boy	6.43894
2005	13	n	c	boy	8.26306
2005	14	n	c	boy	5.52143
2005	15	n	c	boy	5.34389
2005	16	n	c	boy	5.41611
2005	17	n	c	boy	5.34389
2005	18	n	c	boy	3.23984
2005	19	n	c	boy	5.73334
2005	20	n	c	boy	6.06666
2005	21	n	c	boy	6.70606
2005	22	n	c	boy	2.88933
2005	23	n	c	boy	6.42805
2005	24	n	c	boy	7.23412
2005	25	n	c	boy	7.12879
2005	26	n	c	boy	8.21296
2005	27	n	c	boy	5.16004
2005	28	n	c	boy	5.35477
2005	29	n	c	boy	4.63199
2005	30	n	c	boy	4.43727
2005	31	n	c	boy	6.04462
2005	32	n	c	boy	5.35477
2005	33	n	c	boy	6.06666
2005	34	n	c	boy	5.07485
2005	35	n	c	boy	6.51134
2005	36	n	c	boy	7.23412
2005	37	n	c	boy	7.77935
2005	38	n	c	boy	2.7674
2005	39	n	c	boy	7.80741
2005	40	n	c	boy	4.99338
2005	1	o	c	boy	6.87273
2005	2	o	c	boy	4.43727
2005	3	o	c	boy	2.01656
2005	4	o	c	boy	2.87845
2005	5	o	c	boy	2.52794
2005	6	o	c	boy	2.87845
2005	7	o	c	boy	4.9825
2005	8	o	c	boy	5.34389
2005	9	o	c	boy	5.35477
2005	10	o	c	boy	3.2679
2005	11	o	c	boy	7.81829
2005	12	o	c	boy	4.99338
2005	13	o	c	boy	6.45611
2005	14	o	c	boy	4.79866
2005	15	o	c	boy	3.62929
2005	16	o	c	boy	5.16004
2005	17	o	c	boy	7.79023
2005	18	o	c	boy	2.52794
2005	19	o	c	boy	5.35477
2005	20	o	c	boy	4.43727
2005	21	o	c	boy	4.43727
2005	22	o	c	boy	4.99338
2005	23	o	c	boy	3.2679
2005	24	o	c	boy	4.63199
2005	25	o	c	boy	2.01656
2005	26	o	c	boy	2.40601
2005	27	o	c	boy	2.40601
2005	28	o	c	boy	2.87845
2005	29	o	c	boy	2.87845
2005	30	o	c	boy	2.40601
2005	31	o	c	boy	2.40601
2005	32	o	c	boy	0
2005	33	o	c	boy	2.01656
2005	34	o	c	boy	0
2005	35	o	c	boy	4.63199
2005	36	o	c	boy	2.40601
2005	37	o	c	boy	2.40601
2005	38	o	c	boy	5.37195
2005	39	o	c	boy	4.63199
2005	40	o	c	boy	2.40601
2005	1	p	b	boy	1.47133
2005	2	p	b	boy	2.75651
2005	3	p	b	boy	1.66605
2005	4	p	b	boy	2.52794
2005	5	p	b	boy	1.66605
2005	6	p	b	boy	3.2679
2005	7	p	b	boy	4.63199
2005	8	p	b	boy	2.33322
2005	9	p	b	boy	2.02744
2005	10	p	b	boy	1.40139
2005	11	p	b	boy	0.466715
2005	12	p	b	boy	1.8665
2005	13	p	b	boy	0.66144
2005	14	p	b	boy	4.33194
2005	15	p	b	boy	5.70527
2005	16	p	b	boy	2.87845
2005	17	p	b	boy	1.40139
2005	18	p	b	boy	5.34389
2005	19	p	b	boy	2.40601
2005	20	p	b	boy	4.79866
2005	21	p	b	boy	0
2005	22	p	b	boy	4.63199
2005	23	p	b	boy	0
2005	24	p	b	boy	6.51134
2005	25	p	b	boy	0
2005	26	p	b	boy	2.87845
2005	27	p	b	boy	0
2005	28	p	b	boy	4.9825
2005	29	p	b	boy	3.30917
2005	30	p	b	boy	3.2679
2005	31	p	b	boy	4.9825
2005	32	p	b	boy	5.70527
2005	33	p	b	boy	4.63199
2005	34	p	b	boy	0
2005	35	p	b	boy	2.87845
2005	36	p	b	boy	4.99338
2005	37	p	b	boy	7.23412
2005	38	p	b	boy	4.99338
2005	39	p	b	boy	4.79866
2005	40	p	b	boy	2.52794
2005	1	q	b	boy	3.97055
2005	2	q	b	boy	2.87845
2005	3	q	b	boy	2.87845
2005	4	q	b	boy	4.79866
2005	5	q	b	boy	5.16004
2005	6	q	b	boy	4.79866
2005	7	q	b	boy	2.52794
2005	8	q	b	boy	4.43727
2005	9	q	b	boy	2.01656
2005	10	q	b	boy	0
2005	11	q	b	boy	3.30684
2005	12	q	b	boy	2.40601
2005	13	q	b	boy	2.87845
2005	14	q	b	boy	0
2005	15	q	b	boy	0
2005	16	q	b	boy	4.63199
2005	17	q	b	boy	4.63199
2005	18	q	b	boy	3.2679
2005	19	q	b	boy	4.63199
2005	20	q	b	boy	4.63199
2005	21	q	b	boy	3.2679
2005	22	q	b	boy	4.9825
2005	23	q	b	boy	6.51134
2005	24	q	b	boy	4.99338
2005	25	q	b	boy	4.79866
2005	26	q	b	boy	4.63199
2005	27	q	b	boy	6.40601
2005	28	q	b	boy	4.79866
2005	29	q	b	boy	2.88933
2005	30	q	b	boy	4.43727
2005	31	q	b	boy	4.43727
2005	32	q	b	boy	6.14995
2005	33	q	b	boy	4.43727
2005	34	q	b	boy	2.87845
2005	35	q	b	boy	6.09472
2005	36	q	b	boy	4.63199
2005	37	q	b	boy	5.34389
2005	38	q	b	boy	4.63199
2005	39	q	b	boy	2.87845
2005	40	q	b	boy	4.63199
2005	1	r	a	boy	3.93229
2005	2	r	a	boy	3.74102
2005	3	r	a	boy	4.08064
2005	4	r	a	boy	4.86566
2005	5	r	a	boy	9.44769
2005	6	r	a	boy	6.64455
2005	7	r	a	boy	11.6097
2005	8	r	a	boy	8.8753
2005	9	r	a	boy	13.1091
2005	10	r	a	boy	7.51812
2005	11	r	a	boy	9.8537
2005	12	r	a	boy	8.5112
2005	13	r	a	boy	11.4768
2005	14	r	a	boy	7.88298
2005	15	r	a	boy	11.872
2005	16	r	a	boy	14.8776
2005	17	r	a	boy	6.97346
2005	18	r	a	boy	7.46257
2005	19	r	a	boy	5.86123
2005	20	r	a	boy	15.1108
2005	21	r	a	boy	6.97346
2005	22	r	a	boy	10.226
2005	23	r	a	boy	7.69624
2005	24	r	a	boy	10.3926
2005	25	r	a	boy	9.86458
2005	26	r	a	boy	11.4768
2005	27	r	a	boy	8.07481
2005	28	r	a	boy	5.69457
2005	29	r	a	boy	6.2398
2005	30	r	a	boy	6.2398
2005	31	r	a	boy	6.97346
2005	32	r	a	boy	7.32397
2005	33	r	a	boy	5.35036
2005	34	r	a	boy	12.8834
2005	35	r	a	boy	6.03362
2005	36	r	a	boy	9.45626
2005	37	r	a	boy	5.69457
2005	38	r	a	boy	21.3265
2005	39	r	a	boy	7.6688
2005	40	r	a	boy	4.97179
2005	1	s	a	boy	5.16004
2005	2	s	a	boy	5.35477
2005	3	s	a	boy	5.71616
2005	4	s	a	boy	4.79866
2005	5	s	a	boy	6.70606
2005	6	s	a	boy	4.79866
2005	7	s	a	boy	5.52143
2005	8	s	a	boy	4.99338
2005	9	s	a	boy	6.87273
2005	10	s	a	boy	6.51134
2005	11	s	a	boy	4.99338
2005	12	s	a	boy	4.99338
2005	13	s	a	boy	4.63199
2005	14	s	a	boy	4.43727
2005	15	s	a	boy	4.63199
2005	16	s	a	boy	6.7674
2005	17	s	a	boy	4.63199
2005	18	s	a	boy	3.99068
2005	19	s	a	boy	4.43727
2005	20	s	a	boy	0
2005	21	s	a	boy	4.43727
2005	22	s	a	boy	4.43727
2005	23	s	a	boy	2.87845
2005	24	s	a	boy	4.43727
2005	25	s	a	boy	4.99338
2005	26	s	a	boy	7.42884
2005	27	s	a	boy	4.9825
2005	28	s	a	boy	4.63199
2005	29	s	a	boy	7.23412
2005	30	s	a	boy	6.34467
2005	31	s	a	boy	4.43727
2005	32	s	a	boy	4.99338
2005	33	s	a	boy	2.87845
2005	34	s	a	boy	4.79866
2005	35	s	a	boy	4.63199
2005	36	s	a	boy	0
2005	37	s	a	boy	4.47621
2005	38	s	a	boy	4.63199
2005	39	s	a	boy	0
2005	40	s	a	boy	4.99338
2006	1	a	sdav	dav	5.127
2006	2	a	sdav	dav	9.38347
2006	3	a	sdav	dav	6.87091
2006	4	a	sdav	dav	10.0591
2006	5	a	sdav	dav	4.20207
2006	6	a	sdav	dav	5.63046
2006	7	a	sdav	dav	22.9577
2006	8	a	sdav	dav	3.12879
2006	9	a	sdav	dav	8.67786
2006	10	a	sdav	dav	15.7471
2006	11	a	sdav	dav	14.3124
2006	12	a	sdav	dav	4.04283
2006	13	a	sdav	dav	13.2111
2006	14	a	sdav	dav	11.9322
2006	15	a	sdav	dav	15.7408
2006	16	a	sdav	dav	12.8388
2006	17	a	sdav	dav	19.0105
2006	18	a	sdav	dav	7.57652
2006	19	a	sdav	dav	11.7655
2006	20	a	sdav	dav	9.34723
2006	21	a	sdav	dav	13.2283
2006	22	a	sdav	dav	32.7153
2006	23	a	sdav	dav	10.32
2006	24	a	sdav	dav	8.68875
2006	25	a	sdav	dav	14.0453
2006	25	b	sdav	dav	13.5616
2006	1	b	sdav	dav	14.6458
2006	2	b	sdav	dav	15.3857
2006	3	b	sdav	dav	7.10408
2006	4	b	sdav	dav	9.97575
2006	5	b	sdav	dav	10.6705
2006	6	b	sdav	dav	8.31829
2006	7	b	sdav	dav	10.32
2006	8	b	sdav	dav	11.0427
2006	9	b	sdav	dav	14.3124
2006	10	b	sdav	dav	12.4883
2006	11	b	sdav	dav	10.1252
2006	12	b	sdav	dav	15.0071
2006	13	b	sdav	dav	13.5725
2006	14	b	sdav	dav	11.4213
2006	15	b	sdav	dav	13.5896
2006	16	b	sdav	dav	13.2945
2006	17	b	sdav	dav	14.1005
2006	18	b	sdav	dav	17.5649
2006	19	b	sdav	dav	14.2953
2006	20	b	sdav	dav	10.32
2006	21	b	sdav	dav	8.8744
2006	22	b	sdav	dav	12.8497
2006	23	b	sdav	dav	15.018
2006	24	b	sdav	dav	10.042
2006	1	W	cdav	dav	11.2094
2006	2	W	cdav	dav	13.7391
2006	3	W	cdav	dav	16.825
2006	4	W	cdav	dav	10.7427
2006	5	W	cdav	dav	11.7655
2006	6	W	cdav	dav	11.8269
2006	7	W	cdav	dav	13.6338
2006	8	W	cdav	dav	14.718
2006	9	W	cdav	dav	10.848
2006	10	W	cdav	dav	10.0199
2006	11	W	cdav	dav	16.8141
2006	12	W	cdav	dav	11.8269
2006	13	W	cdav	dav	15.8022
2006	14	W	cdav	dav	12.4883
2006	15	W	cdav	dav	11.5708
2006	16	W	cdav	dav	11.2076
2006	17	W	cdav	dav	14.6566
2006	18	W	cdav	dav	7.32838
2006	19	W	cdav	dav	15.018
2006	20	W	cdav	dav	13.5725
2006	21	W	cdav	dav	13.9952
2006	22	W	cdav	dav	11.0427
2006	23	W	cdav	dav	13.0164
2006	24	W	cdav	dav	10.7427
2006	25	W	cdav	dav	11.2094
2006	26	W	cdav	dav	17.1755
2006	27	W	cdav	dav	13.9339
2006	28	W	cdav	dav	21.5122
2006	29	W	cdav	dav	18.2705
2006	30	W	cdav	dav	14.3958
2006	1	c	cdav	dav	15.5443
2006	2	c	cdav	dav	16.4808
2006	3	c	cdav	dav	13.2002
2006	4	c	cdav	dav	13.9339
2006	5	c	cdav	dav	13.6667
2006	6	c	cdav	dav	17.5369
2006	7	c	cdav	dav	12.1269
2006	8	c	cdav	dav	11.0599
2006	9	c	cdav	dav	8.59639
2006	10	c	cdav	dav	12.5997
2006	11	c	cdav	dav	10.6814
2006	12	c	cdav	dav	7.87361
2006	13	c	cdav	dav	14.6738
2006	14	c	cdav	dav	10.1252
2006	15	c	cdav	dav	14.6566
2006	16	c	cdav	dav	24.07
2006	17	c	cdav	dav	9.40064
2006	18	c	cdav	dav	16.4527
2006	19	c	cdav	dav	25.5597
2006	20	c	cdav	dav	23.8581
2006	21	c	cdav	dav	15.8022
2006	22	c	cdav	dav	12.911
2006	23	c	cdav	dav	10.3813
2006	24	c	cdav	dav	12.2936
2006	25	c	cdav	dav	11.2094
2006	26	c	cdav	dav	10.8462
2006	27	c	cdav	dav	18.491
2006	28	c	cdav	dav	7.85157
2006	29	c	cdav	dav	16.4699
2006	30	c	cdav	dav	17.2698
2006	1	d	dav pic	dav	5.94983
2006	2	d	dav pic	dav	0
2006	3	d	dav pic	dav	3.12879
2006	4	d	dav pic	dav	5.02144
2006	5	d	dav pic	dav	2.88933
2006	6	d	dav pic	dav	7.39539
2006	7	d	dav pic	dav	8.235
2006	8	d	dav pic	dav	13.2002
2006	9	d	dav pic	dav	7.87361
2006	10	d	dav pic	dav	9.40246
2006	1	e	dav pic	dav	3.67056
2006	2	e	dav pic	dav	12.972
2006	3	e	dav pic	dav	1.83272
2006	4	e	dav pic	dav	3.23984
2006	5	e	dav pic	dav	5.09894
2006	6	e	dav pic	dav	1.06783
2006	7	e	dav pic	dav	3.32005
2006	8	e	dav pic	dav	0.550494
2006	9	e	dav pic	dav	0.473095
2006	10	e	dav pic	dav	4.43727
2006	1	f	W, PC	dav	7.79023
2006	2	f	W, PC	dav	3.67056
2006	3	f	W, PC	dav	4.71346
2006	4	f	W, PC	dav	7.02311
2006	5	f	W, PC	dav	4.64418
2006	6	f	W, PC	dav	3.8349
2006	7	f	W, PC	dav	5.51645
2006	8	f	W, PC	dav	7.3845
2006	9	f	W, PC	dav	8.28483
2006	10	f	W, PC	dav	6.1699
2006	1	g	W, PC	dav	5.02144
2006	2	g	W, PC	dav	6.31751
2006	3	g	W, PC	dav	9.22491
2006	4	g	W, PC	dav	4.24152
2006	5	g	W, PC	dav	4.71346
2006	6	g	W, PC	dav	4.56397
2006	7	g	W, PC	dav	4.02962
2006	8	g	W, PC	dav	4.39101
2006	9	g	W, PC	dav	4.00156
2006	10	g	W, PC	dav	8.86352
2006	1	h	bdav	dav	9.5863
2006	2	h	bdav	dav	9.29713
2006	3	h	bdav	dav	12.4774
2006	4	h	bdav	dav	11.8489
2006	5	h	bdav	dav	12.8497
2006	6	h	bdav	dav	12.911
2006	7	h	bdav	dav	9.23579
2006	8	h	bdav	dav	9.65852
2006	9	h	bdav	dav	7.59551
2006	10	h	bdav	dav	8.21296
2006	11	h	bdav	dav	7.42884
2006	12	h	bdav	dav	11.4655
2006	13	h	bdav	dav	8.66862
2006	14	h	bdav	dav	10.6973
2006	15	h	bdav	dav	10.3813
2006	16	h	bdav	dav	10.3813
2006	17	h	bdav	dav	9.29713
2006	18	h	bdav	dav	13.5616
2006	19	h	bdav	dav	15.4408
2006	20	h	bdav	dav	0.239723
2006	1	i	bdav	dav	9.04107
2006	2	i	bdav	dav	11.0319
2006	3	i	bdav	dav	10.3813
2006	4	i	bdav	dav	0.834485
2006	5	i	bdav	dav	7.85157
2006	6	i	bdav	dav	9.29713
2006	7	i	bdav	dav	9.65852
2006	8	i	bdav	dav	13.9952
2006	9	i	bdav	dav	11.8269
2006	10	i	bdav	dav	12.911
2006	11	i	bdav	dav	14.3566
2006	12	i	bdav	dav	11.1041
2006	13	i	bdav	dav	10.3813
2006	14	i	bdav	dav	8.57435
2006	15	i	bdav	dav	0.473095
2006	16	i	bdav	dav	8.21296
2006	17	i	bdav	dav	10.0199
2006	18	i	bdav	dav	8.67968
2006	19	i	bdav	dav	2.95067
2006	20	i	bdav	dav	8.21296
2006	1	j	adav	dav	9.25297
2006	2	j	adav	dav	9.97575
2006	3	j	adav	dav	10.0199
2006	4	j	adav	dav	6.45611
2006	5	j	adav	dav	10.4866
2006	6	j	adav	dav	10.848
2006	7	j	adav	dav	9.59718
2006	8	j	adav	dav	8.31829
2006	9	j	adav	dav	9.13533
2006	10	j	adav	dav	7.59551
2006	11	j	adav	dav	9.97575
2006	12	j	adav	dav	11.1041
2006	13	j	adav	dav	8.8744
2006	14	j	adav	dav	9.04107
2006	15	j	adav	dav	8.21296
2006	16	j	adav	dav	10.7427
2006	17	j	adav	dav	11.4041
2006	18	j	adav	dav	5.11611
2006	19	j	adav	dav	10.4866
2006	20	j	adav	dav	9.76385
2006	1	k	adav	dav	9.61436
2006	2	k	adav	dav	8.50213
2006	3	k	adav	dav	12.4883
2006	4	k	adav	dav	9.22491
2006	5	k	adav	dav	12.8497
2006	6	k	adav	dav	10.6705
2006	7	k	adav	dav	12.8497
2006	8	k	adav	dav	7.52311
2006	9	k	adav	dav	11.9322
2006	10	k	adav	dav	9.22491
2006	11	k	adav	dav	13.5896
2006	12	k	adav	dav	10.1814
2006	13	k	adav	dav	12.5055
2006	14	k	adav	dav	10.3371
2006	15	k	adav	dav	11.4041
2006	16	k	adav	dav	9.03925
2006	17	k	adav	dav	16.8422
2006	18	k	adav	dav	10.9322
2006	19	k	adav	dav	8.8744
2006	20	k	adav	dav	6.42805
2006	1	l	Horsebarn	dav	5.16004
2006	2	l	Horsebarn	dav	5.03233
2006	3	l	Horsebarn	dav	5.31084
2006	4	l	Horsebarn	dav	6.82839
2006	5	l	Horsebarn	dav	9.45858
2006	6	l	Horsebarn	dav	7.3234
2006	7	l	Horsebarn	dav	5.43886
2006	8	l	Horsebarn	dav	0
2006	9	l	Horsebarn	dav	1.705
2006	10	l	Horsebarn	dav	7.07652
2006	11	l	Horsebarn	dav	4.09895
2006	12	l	Horsebarn	dav	2.19122
2006	13	l	Horsebarn	dav	0.923206
2006	14	l	Horsebarn	dav	0.759864
2006	15	l	Horsebarn	dav	0.561816
2006	16	l	Horsebarn	dav	0.706438
2006	17	l	Horsebarn	dav	3.53712
2006	18	l	Horsebarn	dav	3.85956
2006	19	l	Horsebarn	dav	0.745219
2006	20	l	Horsebarn	dav	2.79716
2006	1	m	Horsebarn	dav	3.54284
2006	2	m	Horsebarn	dav	2.69723
2006	3	m	Horsebarn	dav	3.83752
2006	4	m	Horsebarn	dav	1.87966
2006	5	m	Horsebarn	dav	4.04313
2006	6	m	Horsebarn	dav	2.9309
2006	7	m	Horsebarn	dav	4.75502
2006	8	m	Horsebarn	dav	4.96091
2006	9	m	Horsebarn	dav	4.74414
2006	10	m	Horsebarn	dav	3.30917
2006	11	m	Horsebarn	dav	4.1854
2006	12	m	Horsebarn	dav	4.39101
2006	13	m	Horsebarn	dav	3.2679
2006	14	m	Horsebarn	dav	4.67094
2006	15	m	Horsebarn	dav	6.91167
2006	16	m	Horsebarn	dav	6.69518
2006	17	m	Horsebarn	dav	1.85732
2006	18	m	Horsebarn	dav	5.21617
2006	19	m	Horsebarn	dav	2.87845
2006	20	m	Horsebarn	dav	0
2006	1	n	c	boy	7.79023
2006	2	n	c	boy	3.97055
2006	3	n	c	boy	4.43727
2006	4	n	c	boy	4.63199
2006	5	n	c	boy	5.34389
2006	6	n	c	boy	2.52794
2006	7	n	c	boy	2.58928
2006	8	n	c	boy	4.33194
2006	9	n	c	boy	6.14995
2006	10	n	c	boy	4.43727
2006	11	n	c	boy	6.87273
2006	12	n	c	boy	7.49018
2006	13	n	c	boy	7.87361
2006	14	n	c	boy	7.42884
2006	15	n	c	boy	6.70606
2006	16	n	c	boy	5.88282
2006	17	n	c	boy	5.34389
2006	18	n	c	boy	2.69461
2006	19	n	c	boy	1.366
2006	20	n	c	boy	2.5555
2006	21	n	c	boy	4.99338
2006	22	n	c	boy	2.69461
2006	23	n	c	boy	5.88282
2006	24	n	c	boy	2.95067
2006	25	n	c	boy	3.9735
2006	26	n	c	boy	5.40818
2006	27	n	c	boy	3.25072
2006	28	n	c	boy	2.19411
2006	29	n	c	boy	2.87845
2006	30	n	c	boy	6.14995
2006	31	n	c	boy	3.67056
2006	32	n	c	boy	4.03194
2006	33	n	c	boy	3.96262
2006	34	n	c	boy	6.43894
2006	35	n	c	boy	1.83272
2006	36	n	c	boy	5.71616
2006	37	n	c	boy	7.23412
2006	38	n	c	boy	4.79866
2006	39	n	c	boy	1.72739
2006	40	n	c	boy	2.69461
2006	1	o	c	boy	6.6056
2006	2	o	c	boy	2.33322
2006	3	o	c	boy	3.056
2006	4	o	c	boy	5.88282
2006	5	o	c	boy	9.40246
2006	6	o	c	boy	5.05472
2006	7	o	c	boy	7.9569
2006	8	o	c	boy	8.41255
2006	9	o	c	boy	6.96699
2006	10	o	c	boy	5.88282
2006	11	o	c	boy	2.87845
2006	12	o	c	boy	3.67056
2006	13	o	c	boy	4.35207
2006	14	o	c	boy	4.39333
2006	15	o	c	boy	2.94148
2006	16	o	c	boy	5.4775
2006	17	o	c	boy	3.61211
2006	18	o	c	boy	7.80741
2006	19	o	c	boy	6.34467
2006	20	o	c	boy	5.35477
2006	21	o	c	boy	5.70527
2006	22	o	c	boy	2.51706
2006	23	o	c	boy	6.42805
2006	24	o	c	boy	5.52143
2006	25	o	c	boy	9.76385
2006	26	o	c	boy	7.32838
2006	27	o	c	boy	7.51222
2006	28	o	c	boy	9.23579
2006	29	o	c	boy	7.32838
2006	30	o	c	boy	7.8845
2006	31	o	c	boy	3.056
2006	32	o	c	boy	0.0735424
2006	33	o	c	boy	6.6699
2006	34	o	c	boy	8.41255
2006	35	o	c	boy	3.056
2006	36	o	c	boy	6.13889
2006	37	o	c	boy	0.420942
2006	38	o	c	boy	2.02744
2006	39	o	c	boy	3.41739
2006	40	o	c	boy	0.122571
2006	1	p	b	boy	9.34723
2006	2	p	b	boy	11.5708
2006	3	p	b	boy	7.06745
2006	4	p	b	boy	3.85157
2006	5	p	b	boy	8.235
2006	6	p	b	boy	2.7674
2006	7	p	b	boy	2.33322
2006	8	p	b	boy	3.83439
2006	9	p	b	boy	6.96699
2006	10	p	b	boy	6.87273
2006	11	p	b	boy	6.40601
2006	12	p	b	boy	6.40601
2006	13	p	b	boy	8.77394
2006	14	p	b	boy	1.366
2006	15	p	b	boy	9.49672
2006	16	p	b	boy	6.49235
2006	17	p	b	boy	9.76385
2006	18	p	b	boy	6.80033
2006	19	p	b	boy	3.9735
2006	20	p	b	boy	6.43894
2006	21	p	b	boy	9.04107
2006	22	p	b	boy	4.57435
2006	23	p	b	boy	7.32838
2006	24	p	b	boy	26.1152
2006	25	p	b	boy	5.41611
2006	26	p	b	boy	3.25072
2006	27	p	b	boy	7.32838
2006	28	p	b	boy	7.68977
2006	29	p	b	boy	2.69461
2006	30	p	b	boy	2.95067
2006	31	p	b	boy	0.0980565
2006	32	p	b	boy	0.589286
2006	33	p	b	boy	4.79866
2006	34	p	b	boy	3.056
2006	35	p	b	boy	5.16004
2006	36	p	b	boy	4.07588
2006	37	p	b	boy	4.69628
2006	38	p	b	boy	5.41611
2006	39	p	b	boy	6.13889
2006	40	p	b	boy	3.41739
2006	1	q	b	boy	6.6056
2006	2	q	b	boy	6.13889
2006	3	q	b	boy	6.24421
2006	4	q	b	boy	5.88282
2006	5	q	b	boy	6.13889
2006	6	q	b	boy	6.50028
2006	7	q	b	boy	6.80033
2006	8	q	b	boy	6.50028
2006	9	q	b	boy	6.96699
2006	10	q	b	boy	4.79866
2006	11	q	b	boy	2.69461
2006	12	q	b	boy	4.07588
2006	13	q	b	boy	3.41739
2006	14	q	b	boy	1.61044
2006	15	q	b	boy	4.50156
2006	16	q	b	boy	4.99338
2006	17	q	b	boy	5.88282
2006	18	q	b	boy	4.07588
2006	19	q	b	boy	4.79866
2006	20	q	b	boy	6.24421
2006	21	q	b	boy	6.6056
2006	22	q	b	boy	1.83272
2006	23	q	b	boy	5.88282
2006	24	q	b	boy	3.96262
2006	25	q	b	boy	5.52143
2006	26	q	b	boy	0.540257
2006	27	q	b	boy	3.25072
2006	28	q	b	boy	0.589286
2006	29	q	b	boy	1.97183
2006	30	q	b	boy	3.96262
2006	31	q	b	boy	6.86167
2006	32	q	b	boy	5.52143
2006	33	q	b	boy	6.52041
2006	34	q	b	boy	3.10073
2006	35	q	b	boy	2.02744
2006	36	q	b	boy	5.04679
2006	37	q	b	boy	3.77878
2006	38	q	b	boy	3.41739
2006	39	q	b	boy	4.79866
2006	40	q	b	boy	4.33489
2006	1	r	a	boy	3.99068
2006	2	r	a	boy	5.43624
2006	3	r	a	boy	4.03194
2006	4	r	a	boy	3.24777
2006	5	r	a	boy	0
2006	6	r	a	boy	4.99338
2006	7	r	a	boy	3.61211
2006	8	r	a	boy	3.25072
2006	9	r	a	boy	5.16004
2006	10	r	a	boy	0.0735424
2006	11	r	a	boy	5.41611
2006	12	r	a	boy	2.94148
2006	13	r	a	boy	0.589286
2006	14	r	a	boy	8.21296
2006	15	r	a	boy	1.50511
2006	16	r	a	boy	1.97183
2006	17	r	a	boy	4.79866
2006	18	r	a	boy	4.2706
2006	19	r	a	boy	1.26255
2006	20	r	a	boy	5.07485
2006	21	r	a	boy	9.22491
2006	22	r	a	boy	6.78944
2006	23	r	a	boy	4.32401
2006	24	r	a	boy	3.25072
2006	25	r	a	boy	5.16004
2006	26	r	a	boy	7.8845
2006	27	r	a	boy	4.99338
2006	28	r	a	boy	6.06666
2006	29	r	a	boy	0.0558525
2006	30	r	a	boy	0.0558525
2006	31	r	a	boy	8.67968
2006	32	r	a	boy	6.80033
2006	33	r	a	boy	3.84578
2006	34	r	a	boy	8.59639
2006	35	r	a	boy	5.16004
2006	36	r	a	boy	12.8388
2006	37	r	a	boy	5.35477
2006	38	r	a	boy	8.60728
2006	39	r	a	boy	9.04107
2006	40	r	a	boy	3.85157
2006	1	s	a	boy	11.5708
2006	2	s	a	boy	5.41611
2006	3	s	a	boy	5.05472
2006	4	s	a	boy	5.7775
2006	5	s	a	boy	5.7775
2006	6	s	a	boy	6.50028
2006	7	s	a	boy	6.1694
2006	8	s	a	boy	8.30723
2006	9	s	a	boy	3.89573
2006	10	s	a	boy	9.3914
2006	11	s	a	boy	8.30723
2006	12	s	a	boy	11.1041
2006	13	s	a	boy	11.3037
2006	14	s	a	boy	13.2724
2006	15	s	a	boy	10.1142
2006	16	s	a	boy	9.50784
2006	17	s	a	boy	12.0376
2006	18	s	a	boy	5.4804
2006	19	s	a	boy	7.85157
2006	20	s	a	boy	8.93574
2006	21	s	a	boy	7.94584
2006	22	s	a	boy	12.911
2006	23	s	a	boy	13.2724
2006	24	s	a	boy	10.0199
2006	25	s	a	boy	13.6338
2006	26	s	a	boy	7.49018
2006	27	s	a	boy	10.5256
2006	28	s	a	boy	4.33194
2006	29	s	a	boy	4.50156
2006	30	s	a	boy	10.1142
2006	31	s	a	boy	3.90921
2006	32	s	a	boy	1.00461
2006	33	s	a	boy	2.19411
2006	34	s	a	boy	5.11901
2006	35	s	a	boy	2.69461
2006	36	s	a	boy	4.75762
2006	37	s	a	boy	5.16004
2006	38	s	a	boy	5.88282
2006	39	s	a	boy	5.41611
2006	40	s	a	boy	4.79866
2007	1	a	sdav	dav	6.15902
2007	2	a	sdav	dav	0.239723
2007	3	a	sdav	dav	9.22491
2007	4	a	sdav	dav	7.87361
2007	5	a	sdav	dav	6.00273
2007	6	a	sdav	dav	10.4142
2007	7	a	sdav	dav	11.0319
2007	8	a	sdav	dav	11.3932
2007	9	a	sdav	dav	2.38883
2007	10	a	sdav	dav	10.6705
2007	11	a	sdav	dav	2.19411
2007	12	a	sdav	dav	6.6056
2007	13	a	sdav	dav	12.1441
2007	14	a	sdav	dav	10.4033
2007	15	a	sdav	dav	7.54028
2007	16	a	sdav	dav	7.89079
2007	17	a	sdav	dav	3.85157
2007	18	a	sdav	dav	15.0071
2007	19	a	sdav	dav	10.4314
2007	20	a	sdav	dav	8.68875
2007	21	a	sdav	dav	5.29713
2007	22	a	sdav	dav	9.31917
2007	23	a	sdav	dav	11.049
2007	24	a	sdav	dav	6.97811
2007	25	a	sdav	dav	1.40139
2007	25	b	sdav	dav	7.28735
2007	1	b	sdav	dav	2.73934
2007	2	b	sdav	dav	12.116
2007	3	b	sdav	dav	8.51301
2007	4	b	sdav	dav	2.34672
2007	5	b	sdav	dav	12.1332
2007	6	b	sdav	dav	10.3091
2007	7	b	sdav	dav	6.24421
2007	8	b	sdav	dav	11.0599
2007	9	b	sdav	dav	9.25297
2007	10	b	sdav	dav	8.26306
2007	11	b	sdav	dav	6.07755
2007	12	b	sdav	dav	6.42805
2007	13	b	sdav	dav	5.70527
2007	14	b	sdav	dav	8.62445
2007	15	b	sdav	dav	0
2007	16	b	sdav	dav	0
2007	17	b	sdav	dav	1.97183
2007	18	b	sdav	dav	5.35477
2007	19	b	sdav	dav	10.1252
2007	20	b	sdav	dav	7.2323
2007	21	b	sdav	dav	5.71616
2007	22	b	sdav	dav	9.76203
2007	23	b	sdav	dav	10.848
2007	24	b	sdav	dav	9.5863
2007	1	W	cdav	dav	10.7427
2007	2	W	cdav	dav	10.32
2007	3	W	cdav	dav	7.85157
2007	4	W	cdav	dav	8.21296
2007	5	W	cdav	dav	8.8744
2007	6	W	cdav	dav	8.31829
2007	7	W	cdav	dav	7.12879
2007	8	W	cdav	dav	10.32
2007	9	W	cdav	dav	9.65852
2007	10	W	cdav	dav	11.4041
2007	11	W	cdav	dav	6.43894
2007	12	W	cdav	dav	9.65852
2007	13	W	cdav	dav	10.1252
2007	14	W	cdav	dav	4.43727
2007	15	W	cdav	dav	7.49018
2007	16	W	cdav	dav	7.85157
2007	17	W	cdav	dav	10.7427
2007	18	W	cdav	dav	8.57435
2007	19	W	cdav	dav	7.49018
2007	20	W	cdav	dav	7.77935
2007	21	W	cdav	dav	5.7775
2007	22	W	cdav	dav	9.22491
2007	23	W	cdav	dav	7.41796
2007	24	W	cdav	dav	4.15996
2007	25	W	cdav	dav	7.42884
2007	26	W	cdav	dav	4.35207
2007	27	W	cdav	dav	7.79023
2007	28	W	cdav	dav	8.26306
2007	29	W	cdav	dav	4.35207
2007	30	W	cdav	dav	8.86352
2007	1	c	cdav	dav	6.86167
2007	2	c	cdav	dav	9.65852
2007	3	c	cdav	dav	10.7427
2007	4	c	cdav	dav	9.59718
2007	5	c	cdav	dav	9.76385
2007	6	c	cdav	dav	10.848
2007	7	c	cdav	dav	10.042
2007	8	c	cdav	dav	7.59551
2007	9	c	cdav	dav	11.7655
2007	10	c	cdav	dav	9.22491
2007	11	c	cdav	dav	8.77394
2007	12	c	cdav	dav	8.8744
2007	13	c	cdav	dav	9.29713
2007	14	c	cdav	dav	5.7775
2007	15	c	cdav	dav	9.29713
2007	16	c	cdav	dav	10.7427
2007	17	c	cdav	dav	12.1883
2007	18	c	cdav	dav	23.3913
2007	19	c	cdav	dav	11.1041
2007	20	c	cdav	dav	0
2007	21	c	cdav	dav	0
2007	22	c	cdav	dav	0
2007	23	c	cdav	dav	7.59551
2007	24	c	cdav	dav	12.911
2007	25	c	cdav	dav	14.718
2007	26	c	cdav	dav	0
2007	27	c	cdav	dav	12.1883
2007	28	c	cdav	dav	15.0794
2007	29	c	cdav	dav	1.19588
2007	30	c	cdav	dav	20.1388
2007	1	d	dav pic	dav	4.03194
2007	2	d	dav pic	dav	7.16172
2007	3	d	dav pic	dav	0
2007	4	d	dav pic	dav	7.06745
2007	5	d	dav pic	dav	11.3426
2007	6	d	dav pic	dav	9.76385
2007	7	d	dav pic	dav	6.8818
2007	8	d	dav pic	dav	8.60728
2007	9	d	dav pic	dav	7.9569
2007	10	d	dav pic	dav	7.92344
2007	1	e	dav pic	dav	4.37384
2007	2	e	dav pic	dav	4.67094
2007	3	e	dav pic	dav	5.85324
2007	4	e	dav pic	dav	7.58445
2007	5	e	dav pic	dav	5.52143
2007	6	e	dav pic	dav	3.44807
2007	7	e	dav pic	dav	0.901163
2007	8	e	dav pic	dav	2.92828
2007	9	e	dav pic	dav	1.85732
2007	10	e	dav pic	dav	6.07755
2007	1	f	W, PC	dav	7.59551
2007	2	f	W, PC	dav	6.78944
2007	3	f	W, PC	dav	9.23579
2007	4	f	W, PC	dav	10.3589
2007	5	f	W, PC	dav	7.55117
2007	6	f	W, PC	dav	7.92344
2007	7	f	W, PC	dav	5.43624
2007	8	f	W, PC	dav	4.92485
2007	9	f	W, PC	dav	6.43894
2007	10	f	W, PC	dav	6.80033
2007	1	g	W, PC	dav	5.34389
2007	2	g	W, PC	dav	4.20207
2007	3	g	W, PC	dav	7.36733
2007	4	g	W, PC	dav	7.23412
2007	5	g	W, PC	dav	6.87273
2007	6	g	W, PC	dav	2.75651
2007	7	g	W, PC	dav	3.50389
2007	8	g	W, PC	dav	7.39539
2007	9	g	W, PC	dav	4.03194
2007	10	g	W, PC	dav	3.12879
2007	1	h	bdav	dav	8.67968
2007	2	h	bdav	dav	8.31829
2007	3	h	bdav	dav	11.1041
2007	4	h	bdav	dav	10.0199
2007	5	h	bdav	dav	3.67345
2007	6	h	bdav	dav	10.0199
2007	7	h	bdav	dav	12.911
2007	8	h	bdav	dav	5.05472
2007	9	h	bdav	dav	10.0199
2007	10	h	bdav	dav	5.7775
2007	11	h	bdav	dav	7.49018
2007	12	h	bdav	dav	0
2007	13	h	bdav	dav	7.85157
2007	14	h	bdav	dav	0
2007	15	h	bdav	dav	7.85157
2007	16	h	bdav	dav	0
2007	17	h	bdav	dav	7.85157
2007	18	h	bdav	dav	8.21296
2007	19	h	bdav	dav	6.40601
2007	20	h	bdav	dav	5.05472
2007	1	i	bdav	dav	9.29713
2007	2	i	bdav	dav	0
2007	3	i	bdav	dav	4.69333
2007	4	i	bdav	dav	9.29713
2007	5	i	bdav	dav	9.65852
2007	6	i	bdav	dav	10.3813
2007	7	i	bdav	dav	6.50028
2007	8	i	bdav	dav	0
2007	9	i	bdav	dav	0
2007	10	i	bdav	dav	9.29713
2007	11	i	bdav	dav	0.834485
2007	12	i	bdav	dav	0
2007	13	i	bdav	dav	1.366
2007	14	i	bdav	dav	8.67968
2007	15	i	bdav	dav	12.911
2007	16	i	bdav	dav	6.50028
2007	17	i	bdav	dav	10.7427
2007	18	i	bdav	dav	8.21296
2007	19	i	bdav	dav	8.57435
2007	20	i	bdav	dav	11.9322
2007	1	j	adav	dav	8.31829
2007	2	j	adav	dav	8.21296
2007	3	j	adav	dav	7.85157
2007	4	j	adav	dav	7.22306
2007	5	j	adav	dav	0.93981
2007	6	j	adav	dav	8.15162
2007	7	j	adav	dav	6.78944
2007	8	j	adav	dav	10.6985
2007	9	j	adav	dav	9.23579
2007	10	j	adav	dav	8.8744
2007	11	j	adav	dav	2.7674
2007	12	j	adav	dav	8.15162
2007	13	j	adav	dav	11.2094
2007	14	j	adav	dav	8.8744
2007	15	j	adav	dav	6.45611
2007	16	j	adav	dav	8.51301
2007	17	j	adav	dav	2.7674
2007	18	j	adav	dav	2.7674
2007	19	j	adav	dav	11.1041
2007	20	j	adav	dav	9.76385
2007	1	k	adav	dav	9.95857
2007	2	k	adav	dav	6.50028
2007	3	k	adav	dav	5.16004
2007	4	k	adav	dav	8.25218
2007	5	k	adav	dav	6.7674
2007	6	k	adav	dav	7.06745
2007	7	k	adav	dav	7.59551
2007	8	k	adav	dav	9.04107
2007	9	k	adav	dav	7.24319
2007	10	k	adav	dav	10.6814
2007	11	k	adav	dav	6.96699
2007	12	k	adav	dav	11.0427
2007	13	k	adav	dav	5.64763
2007	14	k	adav	dav	8.15162
2007	15	k	adav	dav	7.96597
2007	16	k	adav	dav	5.28624
2007	17	k	adav	dav	8.60728
2007	18	k	adav	dav	4.43727
2007	19	k	adav	dav	9.04107
2007	20	k	adav	dav	8.14074
2007	1	l	Horsebarn	dav	7.06745
2007	2	l	Horsebarn	dav	3.29199
2007	3	l	Horsebarn	dav	3.47929
2007	4	l	Horsebarn	dav	3.41739
2007	5	l	Horsebarn	dav	3.62929
2007	6	l	Horsebarn	dav	2.01656
2007	7	l	Horsebarn	dav	2.9306
2007	8	l	Horsebarn	dav	0.923206
2007	9	l	Horsebarn	dav	1.84643
2007	10	l	Horsebarn	dav	6.80033
2007	11	l	Horsebarn	dav	1.66605
2007	12	l	Horsebarn	dav	2.01656
2007	13	l	Horsebarn	dav	4.52135
2007	14	l	Horsebarn	dav	3.30345
2007	15	l	Horsebarn	dav	0.589286
2007	16	l	Horsebarn	dav	0
2007	17	l	Horsebarn	dav	1.29378
2007	18	l	Horsebarn	dav	4.73812
2007	19	l	Horsebarn	dav	3.66484
2007	20	l	Horsebarn	dav	4.37673
2007	1	m	Horsebarn	dav	3.62929
2007	2	m	Horsebarn	dav	0
2007	3	m	Horsebarn	dav	4.67094
2007	4	m	Horsebarn	dav	4.15996
2007	5	m	Horsebarn	dav	3.30917
2007	6	m	Horsebarn	dav	3.67056
2007	7	m	Horsebarn	dav	3.84068
2007	8	m	Horsebarn	dav	4.39363
2007	9	m	Horsebarn	dav	3.37963
2007	10	m	Horsebarn	dav	4.15996
2007	11	m	Horsebarn	dav	1.13467
2007	12	m	Horsebarn	dav	4.19891
2007	13	m	Horsebarn	dav	3.34811
2007	14	m	Horsebarn	dav	3.67572
2007	15	m	Horsebarn	dav	1.50738
2007	16	m	Horsebarn	dav	2.62533
2007	17	m	Horsebarn	dav	0
2007	18	m	Horsebarn	dav	0
2007	19	m	Horsebarn	dav	2.0555
2007	20	m	Horsebarn	dav	3.27878
2007	1	n	c	boy	1.8665
2007	2	n	c	boy	3.056
2007	3	n	c	boy	7.32838
2007	4	n	c	boy	7.68977
2007	5	n	c	boy	6.6056
2007	6	n	c	boy	5.35477
2007	7	n	c	boy	1.65517
2007	8	n	c	boy	2.69461
2007	9	n	c	boy	3.056
2007	10	n	c	boy	3.85157
2007	11	n	c	boy	2.69461
2007	12	n	c	boy	22.6686
2007	13	n	c	boy	11.1983
2007	14	n	c	boy	12.5496
2007	15	n	c	boy	1.00461
2007	16	n	c	boy	2.45017
2007	17	n	c	boy	0.239723
2007	18	n	c	boy	0.601112
2007	19	n	c	boy	1.68528
2007	20	n	c	boy	0.0837787
2007	21	n	c	boy	0.239723
2007	22	n	c	boy	0.834485
2007	23	n	c	boy	1.19588
2007	24	n	c	boy	2.38537
2007	25	n	c	boy	0.0837787
2007	26	n	c	boy	0.93981
2007	27	n	c	boy	0.111705
2007	28	n	c	boy	0.643225
2007	29	n	c	boy	0.643225
2007	30	n	c	boy	3.41739
2007	31	n	c	boy	3.61211
2007	32	n	c	boy	3.25072
2007	33	n	c	boy	1.66605
2007	34	n	c	boy	5.16004
2007	35	n	c	boy	1.8665
2007	36	n	c	boy	8.41255
2007	37	n	c	boy	0.0980565
2007	38	n	c	boy	3.473
2007	39	n	c	boy	0.0558525
2007	40	n	c	boy	0.281835
2007	1	o	c	boy	0.601112
2007	2	o	c	boy	3.056
2007	3	o	c	boy	1.50511
2007	4	o	c	boy	3.77878
2007	5	o	c	boy	0.0558525
2007	6	o	c	boy	5.52143
2007	7	o	c	boy	1.10994
2007	8	o	c	boy	1.79061
2007	9	o	c	boy	0.281835
2007	10	o	c	boy	1.98533
2007	11	o	c	boy	0.281835
2007	12	o	c	boy	1.50511
2007	13	o	c	boy	0.0837787
2007	14	o	c	boy	1.00461
2007	15	o	c	boy	0.473095
2007	16	o	c	boy	1.00461
2007	17	o	c	boy	1.10994
2007	18	o	c	boy	0.122571
2007	19	o	c	boy	2.69461
2007	20	o	c	boy	0.564771
2007	21	o	c	boy	0.0558525
2007	22	o	c	boy	1.55727
2007	23	o	c	boy	0.601112
2007	24	o	c	boy	0.122571
2007	25	o	c	boy	1.68528
2007	26	o	c	boy	1.42922
2007	27	o	c	boy	0
2007	28	o	c	boy	0.122571
2007	29	o	c	boy	0.561816
2007	30	o	c	boy	1.19588
2007	31	o	c	boy	0.601112
2007	32	o	c	boy	0.0951008
2007	33	o	c	boy	0.57842
2007	34	o	c	boy	1.50511
2007	35	o	c	boy	1.64599
2007	36	o	c	boy	0.0980565
2007	37	o	c	boy	0.0837787
2007	38	o	c	boy	0.122571
2007	39	o	c	boy	0.473095
2007	40	o	c	boy	2.52794
2007	1	p	b	boy	1.366
2007	2	p	b	boy	2.58928
2007	3	p	b	boy	1.8665
2007	4	p	b	boy	2.7674
2007	5	p	b	boy	3.96262
2007	6	p	b	boy	1.10994
2007	7	p	b	boy	1.72739
2007	8	p	b	boy	1.14372
2007	9	p	b	boy	3.31206
2007	10	p	b	boy	3.41739
2007	11	p	b	boy	2.22789
2007	12	p	b	boy	3.056
2007	13	p	b	boy	0.943275
2007	14	p	b	boy	2.38883
2007	15	p	b	boy	1.29378
2007	16	p	b	boy	3.41739
2007	17	p	b	boy	6.07755
2007	18	p	b	boy	6.96699
2007	19	p	b	boy	2.16655
2007	20	p	b	boy	7.16172
2007	21	p	b	boy	4.99338
2007	22	p	b	boy	0.0594794
2007	23	p	b	boy	0
2007	24	p	b	boy	0
2007	25	p	b	boy	0
2007	26	p	b	boy	2.7674
2007	27	p	b	boy	3.60123
2007	28	p	b	boy	1.14372
2007	29	p	b	boy	0.93981
2007	30	p	b	boy	2.58928
2007	31	p	b	boy	1.10994
2007	32	p	b	boy	2.22789
2007	33	p	b	boy	1.97183
2007	34	p	b	boy	1.47133
2007	35	p	b	boy	0.281835
2007	36	p	b	boy	2.58928
2007	37	p	b	boy	0.74855
2007	38	p	b	boy	3.32005
2007	39	p	b	boy	6.06666
2007	40	p	b	boy	4.43727
2007	1	q	b	boy	2.22789
2007	2	q	b	boy	2.95067
2007	3	q	b	boy	5.41611
2007	4	q	b	boy	4.33194
2007	5	q	b	boy	0.643225
2007	6	q	b	boy	5.41611
2007	7	q	b	boy	9.59718
2007	8	q	b	boy	10.7427
2007	9	q	b	boy	0.773145
2007	10	q	b	boy	5.35477
2007	11	q	b	boy	1.66605
2007	12	q	b	boy	2.19411
2007	13	q	b	boy	2.69461
2007	14	q	b	boy	4.32401
2007	15	q	b	boy	2.58928
2007	16	q	b	boy	2.22789
2007	17	q	b	boy	1.61044
2007	18	q	b	boy	3.85157
2007	19	q	b	boy	1.19588
2007	20	q	b	boy	0.93981
2007	21	q	b	boy	0.0837787
2007	22	q	b	boy	1.29378
2007	23	q	b	boy	0.601112
2007	24	q	b	boy	0.643225
2007	25	q	b	boy	0.601112
2007	26	q	b	boy	0.122571
2007	27	q	b	boy	1.8665
2007	28	q	b	boy	0.239723
2007	29	q	b	boy	1.00461
2007	30	q	b	boy	0.0980565
2007	31	q	b	boy	2.95067
2007	32	q	b	boy	1.47133
2007	33	q	b	boy	3.12879
2007	34	q	b	boy	0.0980565
2007	35	q	b	boy	4.69333
2007	36	q	b	boy	3.9735
2007	37	q	b	boy	4.69333
2007	38	q	b	boy	0.57842
2007	39	q	b	boy	0.473095
2007	40	q	b	boy	0.111705
2007	1	r	a	boy	4.54679
2007	2	r	a	boy	7.23412
2007	3	r	a	boy	5.34389
2007	4	r	a	boy	3.97055
2007	5	r	a	boy	7.52311
2007	6	r	a	boy	10.4866
2007	7	r	a	boy	3.41739
2007	8	r	a	boy	5.16004
2007	9	r	a	boy	5.05472
2007	10	r	a	boy	12.7082
2007	11	r	a	boy	5.05472
2007	12	r	a	boy	11.8463
2007	13	r	a	boy	11.2013
2007	14	r	a	boy	7.49018
2007	15	r	a	boy	9.40246
2007	16	r	a	boy	6.87273
2007	17	r	a	boy	9.59718
2007	18	r	a	boy	3.41739
2007	19	r	a	boy	9.29713
2007	20	r	a	boy	0.834485
2007	21	r	a	boy	0.74855
2007	22	r	a	boy	2.01656
2007	23	r	a	boy	8.15162
2007	24	r	a	boy	6.24421
2007	25	r	a	boy	5.41906
2007	26	r	a	boy	9.31658
2007	27	r	a	boy	2.33322
2007	28	r	a	boy	9.65852
2007	29	r	a	boy	9.29713
2007	30	r	a	boy	2.28004
2007	31	r	a	boy	8.30723
2007	32	r	a	boy	12.5496
2007	33	r	a	boy	4.69333
2007	34	r	a	boy	4.03484
2007	35	r	a	boy	16.8863
2007	36	r	a	boy	2.33322
2007	37	r	a	boy	5.88282
2007	38	r	a	boy	9.22491
2007	39	r	a	boy	5.28624
2007	40	r	a	boy	6.74269
2007	1	s	a	boy	3.47929
2007	2	s	a	boy	7.94584
2007	3	s	a	boy	5.41611
2007	4	s	a	boy	4.79866
2007	5	s	a	boy	6.50028
2007	6	s	a	boy	5.05472
2007	7	s	a	boy	5.41611
2007	8	s	a	boy	4.75762
2007	9	s	a	boy	5.05472
2007	10	s	a	boy	6.13889
2007	11	s	a	boy	5.7775
2007	12	s	a	boy	7.68977
2007	13	s	a	boy	9.76385
2007	14	s	a	boy	0.473095
2007	15	s	a	boy	4.33194
2007	16	s	a	boy	3.31206
2007	17	s	a	boy	3.17295
2007	18	s	a	boy	0.0980565
2007	19	s	a	boy	1.72739
2007	20	s	a	boy	0.643225
2007	21	s	a	boy	5.41611
2007	22	s	a	boy	1.50511
2007	23	s	a	boy	2.58928
2007	24	s	a	boy	3.31206
2007	25	s	a	boy	4.03484
2007	26	s	a	boy	1.14372
2007	27	s	a	boy	4.33194
2007	28	s	a	boy	2.58928
2007	29	s	a	boy	0.122571
2007	30	s	a	boy	10.7427
2007	31	s	a	boy	4.39623
2007	32	s	a	boy	1.366
2007	33	s	a	boy	1.72739
2007	34	s	a	boy	1.14372
2007	35	s	a	boy	0.473095
2007	36	s	a	boy	0.0594794
2007	37	s	a	boy	0.281835
2007	38	s	a	boy	2.58928
2007	39	s	a	boy	1.8665
2007	40	s	a	boy	5.16004
2008	1	a	sdav	dav	7.8845
2008	2	a	sdav	dav	8.59639
2008	3	a	sdav	dav	3.61211
2008	4	a	sdav	dav	1.62394
2008	5	a	sdav	dav	11.0319
2008	6	a	sdav	dav	10.6814
2008	7	a	sdav	dav	8.62445
2008	8	a	sdav	dav	6.78944
2008	9	a	sdav	dav	13.2283
2008	10	a	sdav	dav	4.6854
2008	11	a	sdav	dav	11.137
2008	12	a	sdav	dav	3.96262
2008	13	a	sdav	dav	5.78045
2008	14	a	sdav	dav	7.5874
2008	15	a	sdav	dav	8.96867
2008	16	a	sdav	dav	8.26306
2008	17	a	sdav	dav	8.59639
2008	18	a	sdav	dav	10.7647
2008	19	a	sdav	dav	5.05767
2008	20	a	sdav	dav	10.7928
2008	21	a	sdav	dav	12.2212
2008	22	a	sdav	dav	11.4875
2008	23	a	sdav	dav	3.28627
2008	24	a	sdav	dav	0
2008	25	a	sdav	dav	0
2008	25	b	sdav	dav	5.87734
2008	1	b	sdav	dav	11.5156
2008	2	b	sdav	dav	11.1542
2008	3	b	sdav	dav	9.31917
2008	4	b	sdav	dav	5.127
2008	5	b	sdav	dav	10.32
2008	6	b	sdav	dav	13.0164
2008	7	b	sdav	dav	11.4875
2008	8	b	sdav	dav	7.87361
2008	9	b	sdav	dav	10.4033
2008	10	b	sdav	dav	5.27995
2008	11	b	sdav	dav	8.66069
2008	12	b	sdav	dav	5.79763
2008	13	b	sdav	dav	6.52041
2008	14	b	sdav	dav	6.49235
2008	15	b	sdav	dav	18.0206
2008	16	b	sdav	dav	0
2008	17	b	sdav	dav	5.09894
2008	18	b	sdav	dav	2.2021
2008	19	b	sdav	dav	3.34761
2008	20	b	sdav	dav	0
2008	21	b	sdav	dav	9.76385
2008	22	b	sdav	dav	5.816
2008	23	b	sdav	dav	15.5907
2008	24	b	sdav	dav	13.5725
2008	1	W	cdav	dav	8.21296
2008	2	W	cdav	dav	11.1041
2008	3	W	cdav	dav	13.3777
2008	4	W	cdav	dav	8.93574
2008	5	W	cdav	dav	8.8744
2008	6	W	cdav	dav	10.6814
2008	7	W	cdav	dav	16.4527
2008	8	W	cdav	dav	10.3091
2008	9	W	cdav	dav	11.7546
2008	10	W	cdav	dav	11.9322
2008	11	W	cdav	dav	9.49672
2008	12	W	cdav	dav	11.9322
2008	13	W	cdav	dav	8.93574
2008	14	W	cdav	dav	9.59718
2008	15	W	cdav	dav	13.3116
2008	16	W	cdav	dav	11.0319
2008	17	W	cdav	dav	18.9824
2008	18	W	cdav	dav	10.3371
2008	19	W	cdav	dav	9.76385
2008	20	W	cdav	dav	11.5708
2008	21	W	cdav	dav	9.29713
2008	22	W	cdav	dav	13.2283
2008	23	W	cdav	dav	9.5863
2008	24	W	cdav	dav	10.3091
2008	25	W	cdav	dav	11.4041
2008	26	W	cdav	dav	11.0319
2008	27	W	cdav	dav	42.6393
2008	28	W	cdav	dav	16.8141
2008	29	W	cdav	dav	5.09894
2008	30	W	cdav	dav	13.5896
2008	1	c	cdav	dav	15.0071
2008	2	c	cdav	dav	10.3813
2008	3	c	cdav	dav	13.5616
2008	4	c	cdav	dav	17.5541
2008	5	c	cdav	dav	13.2002
2008	6	c	cdav	dav	3.63678
2008	7	c	cdav	dav	12.1441
2008	8	c	cdav	dav	7.51222
2008	9	c	cdav	dav	12.1269
2008	10	c	cdav	dav	9.59718
2008	11	c	cdav	dav	11.3932
2008	12	c	cdav	dav	14.718
2008	13	c	cdav	dav	11.4655
2008	14	c	cdav	dav	21.9458
2008	15	c	cdav	dav	19.7774
2008	16	c	cdav	dav	20.5002
2008	17	c	cdav	dav	13.2724
2008	18	c	cdav	dav	7.58445
2008	19	c	cdav	dav	10.0199
2008	20	c	cdav	dav	12.2936
2008	21	c	cdav	dav	9.76385
2008	22	c	cdav	dav	11.8269
2008	23	c	cdav	dav	12.911
2008	24	c	cdav	dav	13.2724
2008	25	c	cdav	dav	11.8269
2008	26	c	cdav	dav	11.1041
2008	27	c	cdav	dav	11.9322
2008	28	c	cdav	dav	12.4774
2008	29	c	cdav	dav	9.65852
2008	30	c	cdav	dav	13.2724
2008	1	d	dav pic	dav	9.13533
2008	2	d	dav pic	dav	7.2323
2008	3	d	dav pic	dav	5.78045
2008	4	d	dav pic	dav	6.14813
2008	5	d	dav pic	dav	6.35374
2008	6	d	dav pic	dav	2.80634
2008	7	d	dav pic	dav	8.96867
2008	8	d	dav pic	dav	7.2988
2008	9	d	dav pic	dav	7.59551
2008	10	d	dav pic	dav	11.0319
2008	1	e	dav pic	dav	8.60728
2008	2	e	dav pic	dav	8.60728
2008	3	e	dav pic	dav	13.2945
2008	4	e	dav pic	dav	9.69145
2008	5	e	dav pic	dav	7.15083
2008	6	e	dav pic	dav	1.12365
2008	7	e	dav pic	dav	3.84068
2008	8	e	dav pic	dav	6.80033
2008	9	e	dav pic	dav	1.10994
2008	10	e	dav pic	dav	2.7674
2008	1	f	W, PC	dav	9.99752
2008	2	f	W, PC	dav	12.4883
2008	3	f	W, PC	dav	4.06347
2008	4	f	W, PC	dav	6.467
2008	5	f	W, PC	dav	11.4431
2008	6	f	W, PC	dav	3.36246
2008	7	f	W, PC	dav	3.32351
2008	8	f	W, PC	dav	4.93624
2008	9	f	W, PC	dav	4.91907
2008	10	f	W, PC	dav	11.8045
2008	1	g	W, PC	dav	11.0989
2008	2	g	W, PC	dav	5.57756
2008	3	g	W, PC	dav	5.34389
2008	4	g	W, PC	dav	5.22705
2008	5	g	W, PC	dav	6.60062
2008	6	g	W, PC	dav	5.88759
2008	7	g	W, PC	dav	8.92242
2008	8	g	W, PC	dav	2.56921
2008	9	g	W, PC	dav	2.61162
2008	10	g	W, PC	dav	0.0594794
2008	1	h	bdav	dav	10.3091
2008	2	h	bdav	dav	10.3813
2008	3	h	bdav	dav	11.1041
2008	4	h	bdav	dav	16.1635
2008	5	h	bdav	dav	11.8269
2008	6	h	bdav	dav	10.7427
2008	7	h	bdav	dav	11.1983
2008	8	h	bdav	dav	0.473095
2008	9	h	bdav	dav	8.66862
2008	10	h	bdav	dav	7.22306
2008	11	h	bdav	dav	8.05116
2008	12	h	bdav	dav	11.8269
2008	13	h	bdav	dav	11.4655
2008	14	h	bdav	dav	6.24421
2008	15	h	bdav	dav	10.4756
2008	16	h	bdav	dav	13.9952
2008	17	h	bdav	dav	12.1883
2008	18	h	bdav	dav	10.0199
2008	19	h	bdav	dav	7.58445
2008	20	h	bdav	dav	11.9211
2008	1	i	bdav	dav	10.3813
2008	2	i	bdav	dav	2.91689
2008	3	i	bdav	dav	14.4619
2008	4	i	bdav	dav	0.239723
2008	5	i	bdav	dav	12.5496
2008	6	i	bdav	dav	8.57435
2008	7	i	bdav	dav	11.8269
2008	8	i	bdav	dav	10.7427
2008	9	i	bdav	dav	9.65852
2008	10	i	bdav	dav	8.21296
2008	11	i	bdav	dav	0.962502
2008	12	i	bdav	dav	1.55727
2008	13	i	bdav	dav	0.239723
2008	14	i	bdav	dav	1.19588
2008	15	i	bdav	dav	11.1041
2008	16	i	bdav	dav	1.00461
2008	17	i	bdav	dav	0.643225
2008	18	i	bdav	dav	8.93574
2008	19	i	bdav	dav	13.6338
2008	20	i	bdav	dav	11.8269
2008	1	j	adav	dav	10.7647
2008	2	j	adav	dav	10.837
2008	3	j	adav	dav	9.40246
2008	4	j	adav	dav	10.4866
2008	5	j	adav	dav	15.4628
2008	6	j	adav	dav	14.6458
2008	7	j	adav	dav	8.60728
2008	8	j	adav	dav	12.8497
2008	9	j	adav	dav	11.9322
2008	10	j	adav	dav	10.4866
2008	11	j	adav	dav	15.2236
2008	12	j	adav	dav	8.68875
2008	13	j	adav	dav	11.1542
2008	14	j	adav	dav	18.4372
2008	15	j	adav	dav	9.95857
2008	16	j	adav	dav	7.68977
2008	17	j	adav	dav	8.41255
2008	18	j	adav	dav	10.4033
2008	19	j	adav	dav	16.4808
2008	20	j	adav	dav	15.4408
2008	1	k	adav	dav	11.4322
2008	2	k	adav	dav	8.95778
2008	3	k	adav	dav	10.6814
2008	4	k	adav	dav	13.923
2008	5	k	adav	dav	9.29713
2008	6	k	adav	dav	9.40246
2008	7	k	adav	dav	10.3091
2008	8	k	adav	dav	7.90167
2008	9	k	adav	dav	11.0427
2008	10	k	adav	dav	3.67345
2008	11	k	adav	dav	7.16172
2008	12	k	adav	dav	14.1948
2008	13	k	adav	dav	5.40818
2008	14	k	adav	dav	12.1105
2008	15	k	adav	dav	14.2953
2008	16	k	adav	dav	0.111705
2008	17	k	adav	dav	9.76203
2008	18	k	adav	dav	8.24589
2008	19	k	adav	dav	11.9322
2008	20	k	adav	dav	12.8497
2008	1	l	Horsebarn	dav	5.8813
2008	2	l	Horsebarn	dav	4.97751
2008	3	l	Horsebarn	dav	9.45309
2008	4	l	Horsebarn	dav	4.10241
2008	5	l	Horsebarn	dav	5.15852
2008	6	l	Horsebarn	dav	4.64418
2008	7	l	Horsebarn	dav	4.92169
2008	8	l	Horsebarn	dav	1.06783
2008	9	l	Horsebarn	dav	3.60123
2008	10	l	Horsebarn	dav	4.26561
2008	11	l	Horsebarn	dav	2.56921
2008	12	l	Horsebarn	dav	3.8349
2008	13	l	Horsebarn	dav	3.54284
2008	14	l	Horsebarn	dav	1.85732
2008	15	l	Horsebarn	dav	0
2008	16	l	Horsebarn	dav	1.98533
2008	17	l	Horsebarn	dav	3.63678
2008	18	l	Horsebarn	dav	0
2008	19	l	Horsebarn	dav	4.15996
2008	20	l	Horsebarn	dav	2.56921
2008	1	m	Horsebarn	dav	3.46262
2008	2	m	Horsebarn	dav	0.706438
2008	3	m	Horsebarn	dav	0
2008	4	m	Horsebarn	dav	1.49593
2008	5	m	Horsebarn	dav	2.56921
2008	6	m	Horsebarn	dav	2.72529
2008	7	m	Horsebarn	dav	2.55261
2008	8	m	Horsebarn	dav	4.07435
2008	9	m	Horsebarn	dav	0
2008	10	m	Horsebarn	dav	3.12879
2008	11	m	Horsebarn	dav	3.80946
2008	12	m	Horsebarn	dav	2.95866
2008	13	m	Horsebarn	dav	3.32005
2008	14	m	Horsebarn	dav	0.784011
2008	15	m	Horsebarn	dav	9.4414
2008	16	m	Horsebarn	dav	4.03224
2008	17	m	Horsebarn	dav	0.773145
2008	18	m	Horsebarn	dav	10.5809
2008	19	m	Horsebarn	dav	3.54284
2008	20	m	Horsebarn	dav	4.26561
2008	1	n	c	boy	0.550494
2008	2	n	c	boy	2.58928
2008	3	n	c	boy	5.16004
2008	4	n	c	boy	5.52143
2008	5	n	c	boy	2.88933
2008	6	n	c	boy	2.87845
2008	7	n	c	boy	1.13454
2008	8	n	c	boy	1.42922
2008	9	n	c	boy	8.529
2008	10	n	c	boy	3.71449
2008	11	n	c	boy	0.93981
2008	12	n	c	boy	1.10994
2008	13	n	c	boy	3.12879
2008	14	n	c	boy	0.74855
2008	15	n	c	boy	0.74855
2008	16	n	c	boy	1.61044
2008	17	n	c	boy	0.57842
2008	18	n	c	boy	1.48504
2008	19	n	c	boy	1.55727
2008	20	n	c	boy	2.75651
2008	21	n	c	boy	0.0980565
2008	22	n	c	boy	1.47133
2008	23	n	c	boy	2.33322
2008	24	n	c	boy	2.87845
2008	25	n	c	boy	1.14372
2008	26	n	c	boy	2.33322
2008	27	n	c	boy	0.420942
2008	28	n	c	boy	1.66259
2008	29	n	c	boy	4.43727
2008	30	n	c	boy	0.549109
2008	31	n	c	boy	3.43089
2008	32	n	c	boy	2.52499
2008	33	n	c	boy	1.10994
2008	34	n	c	boy	0.0595524
2008	35	n	c	boy	1.49593
2008	36	n	c	boy	2.33322
2008	37	n	c	boy	2.99171
2008	38	n	c	boy	3.66426
2008	39	n	c	boy	0.111705
2008	40	n	c	boy	0.57842
2008	1	o	c	boy	5.58573
2008	2	o	c	boy	0.111705
2008	3	o	c	boy	6.30851
2008	4	o	c	boy	8.05116
2008	5	o	c	boy	6.6056
2008	6	o	c	boy	8.47685
2008	7	o	c	boy	11.9211
2008	8	o	c	boy	4.72434
2008	9	o	c	boy	3.11161
2008	10	o	c	boy	10.1142
2008	11	o	c	boy	2.87478
2008	12	o	c	boy	0.0980565
2008	13	o	c	boy	7.44829
2008	14	o	c	boy	8.33774
2008	15	o	c	boy	12.6469
2008	16	o	c	boy	24.5698
2008	17	o	c	boy	12.1429
2008	18	o	c	boy	16.1217
2008	19	o	c	boy	3.67345
2008	20	o	c	boy	0.93981
2008	21	o	c	boy	0.962502
2008	22	o	c	boy	3.96262
2008	23	o	c	boy	0.784011
2008	24	o	c	boy	0.589286
2008	25	o	c	boy	4.72434
2008	26	o	c	boy	0.589439
2008	27	o	c	boy	6.07755
2008	28	o	c	boy	0.589439
2008	29	o	c	boy	3.65338
2008	30	o	c	boy	9.92241
2008	31	o	c	boy	6.20058
2008	32	o	c	boy	6.36725
2008	33	o	c	boy	4.22384
2008	34	o	c	boy	2.88933
2008	35	o	c	boy	13.4167
2008	36	o	c	boy	7.51222
2008	37	o	c	boy	10.9812
2008	38	o	c	boy	0.759497
2008	39	o	c	boy	2.06922
2008	40	o	c	boy	0.473095
2008	1	p	b	boy	5.05472
2008	2	p	b	boy	3.77878
2008	3	p	b	boy	4.39623
2008	4	p	b	boy	3.25072
2008	5	p	b	boy	9.75279
2008	6	p	b	boy	8.05116
2008	7	p	b	boy	5.16004
2008	8	p	b	boy	5.41611
2008	9	p	b	boy	2.88933
2008	10	p	b	boy	5.41611
2008	11	p	b	boy	1.8665
2008	12	p	b	boy	3.056
2008	13	p	b	boy	2.88933
2008	14	p	b	boy	2.52794
2008	15	p	b	boy	4.43727
2008	16	p	b	boy	1.30466
2008	17	p	b	boy	2.69461
2008	18	p	b	boy	2.95067
2008	19	p	b	boy	6.24421
2008	20	p	b	boy	5.35477
2008	21	p	b	boy	1.49593
2008	22	p	b	boy	4.99338
2008	23	p	b	boy	0.887657
2008	24	p	b	boy	3.97055
2008	25	p	b	boy	1.8665
2008	26	p	b	boy	4.79866
2008	27	p	b	boy	2.38883
2008	28	p	b	boy	0.122571
2008	29	p	b	boy	0.550494
2008	30	p	b	boy	1.84643
2008	31	p	b	boy	5.34389
2008	32	p	b	boy	2.73934
2008	33	p	b	boy	0.93981
2008	34	p	b	boy	6.15902
2008	35	p	b	boy	5.88282
2008	36	p	b	boy	1.97183
2008	37	p	b	boy	1.3012
2008	38	p	b	boy	5.16004
2008	39	p	b	boy	6.09472
2008	40	p	b	boy	2.19411
2008	1	q	b	boy	5.41611
2008	2	q	b	boy	1.8665
2008	3	q	b	boy	0.0980565
2008	4	q	b	boy	5.7775
2008	5	q	b	boy	0.643225
2008	6	q	b	boy	1.8665
2008	7	q	b	boy	1.00461
2008	8	q	b	boy	4.33194
2008	9	q	b	boy	4.07588
2008	10	q	b	boy	1.50511
2008	11	q	b	boy	2.22789
2008	12	q	b	boy	0.0980565
2008	13	q	b	boy	8.21296
2008	14	q	b	boy	1.10994
2008	15	q	b	boy	5.52143
2008	16	q	b	boy	4.07588
2008	17	q	b	boy	8.67968
2008	18	q	b	boy	4.33194
2008	19	q	b	boy	8.96867
2008	20	q	b	boy	6.96699
2008	21	q	b	boy	11.9322
2008	22	q	b	boy	6.07755
2008	23	q	b	boy	4.92485
2008	24	q	b	boy	6.07755
2008	25	q	b	boy	3.056
2008	26	q	b	boy	3.97055
2008	27	q	b	boy	1.61044
2008	28	q	b	boy	8.30723
2008	29	q	b	boy	0.0837787
2008	30	q	b	boy	1.50511
2008	31	q	b	boy	2.33322
2008	32	q	b	boy	1.50511
2008	33	q	b	boy	2.22789
2008	34	q	b	boy	5.05472
2008	35	q	b	boy	3.60916
2008	36	q	b	boy	2.58928
2008	37	q	b	boy	4.70257
2008	38	q	b	boy	6.43894
2008	39	q	b	boy	3.60916
2008	40	q	b	boy	8.77394
2008	1	r	a	boy	3.99068
2008	2	r	a	boy	6.43894
2008	3	r	a	boy	10.7427
2008	4	r	a	boy	7.42884
2008	5	r	a	boy	4.63199
2008	6	r	a	boy	11.877
2008	7	r	a	boy	1.61044
2008	8	r	a	boy	7.64584
2008	9	r	a	boy	2.95067
2008	10	r	a	boy	2.91689
2008	11	r	a	boy	1.366
2008	12	r	a	boy	3.89573
2008	13	r	a	boy	7.58445
2008	14	r	a	boy	8.30723
2008	15	r	a	boy	2.75022
2008	16	r	a	boy	10.4756
2008	17	r	a	boy	10.3813
2008	18	r	a	boy	15.0794
2008	19	r	a	boy	1.83272
2008	20	r	a	boy	8.96867
2008	21	r	a	boy	7.14824
2008	22	r	a	boy	11.5597
2008	23	r	a	boy	2.95067
2008	24	r	a	boy	0.0594794
2008	25	r	a	boy	5.68323
2008	26	r	a	boy	5.52143
2008	27	r	a	boy	0.111705
2008	28	r	a	boy	3.9735
2008	29	r	a	boy	5.05767
2008	30	r	a	boy	7.59551
2008	31	r	a	boy	5.08523
2008	32	r	a	boy	0.111705
2008	33	r	a	boy	6.07755
2008	34	r	a	boy	6.13889
2008	35	r	a	boy	5.52143
2008	36	r	a	boy	3.49223
2008	37	r	a	boy	0.0980565
2008	38	r	a	boy	1.54066
2008	39	r	a	boy	3.67345
2008	40	r	a	boy	1.72739
2008	1	s	a	boy	11.2094
2008	2	s	a	boy	0.239723
2008	3	s	a	boy	0.0558525
2008	4	s	a	boy	7.58445
2008	5	s	a	boy	5.52143
2008	6	s	a	boy	9.04107
2008	7	s	a	boy	7.22306
2008	8	s	a	boy	8.21296
2008	9	s	a	boy	6.13889
2008	10	s	a	boy	8.21296
2008	11	s	a	boy	8.41255
2008	12	s	a	boy	7.32838
2008	13	s	a	boy	7.58445
2008	14	s	a	boy	10.0528
2008	15	s	a	boy	5.05767
2008	16	s	a	boy	3.056
2008	17	s	a	boy	0.0837787
2008	18	s	a	boy	4.33194
2008	19	s	a	boy	5.41611
[truncated: 5,391 more rows]
